34 **Abstract**

35           In 2017 over 550,000 estimated new cases of multi-drug/rifampicin resistant tuberculosis  
36 (MDR/RR-TB) occurred, emphasizing a need for new treatment strategies. Linezolid (LZD) is a  
37 potent antibiotic for drug-resistant Gram-positive infections and is an effective treatment for TB.  
38 However, extended LZD use can lead to LZD-associated host toxicities, most commonly bone  
39 marrow suppression. LZD toxicities may be mediated by IL-1, an inflammatory pathway  
40 important for early immunity during *M. tuberculosis* infection. However, IL-1 can contribute to  
41 pathology and disease severity late in TB progression. Since IL-1 may contribute to LZD toxicity  
42 and does influence TB pathology, we targeted this pathway with a potential host-directed  
43 therapy (HDT). We hypothesized LZD efficacy could be enhanced by modulation of IL-1  
44 pathway to reduce bone marrow toxicity and TB associated-inflammation. We used two animal  
45 models of TB to test our hypothesis, a TB-susceptible mouse model and clinically relevant  
46 cynomolgus macaques. Antagonizing IL-1 in mice with established infection reduced lung  
47 neutrophil numbers and partially restored the erythroid progenitor populations that are depleted  
48 by LZD. In macaques, we found no conclusive evidence of bone marrow suppression  
49 associated with LZD, indicating our treatment time may have been short enough to avoid the  
50 toxicities observed in humans. Though treatment was only 4 weeks (the FDA approved  
51 regimen at the time of study), we observed sterilization of the majority of granulomas regardless  
52 of co-administration of the FDA-approved IL-1 receptor antagonist (IL-1Rn), also known as  
53 Anakinra. However total lung inflammation was significantly reduced in macaques treated with  
54 IL-1Rn and LZD compared to LZD alone. Importantly, IL-1Rn administration did not impair the  
55 host response against Mtb or LZD efficacy in either animal model. Together, our data support  
56 that inhibition of IL-1 in combination with LZD has potential to be an effective HDT for TB and  
57 the need for further research in this area.

58

## 59 Introduction

60 Tuberculosis (TB) remains the top cause of death by a single infectious agent, with an  
61 estimated 10 million new cases of active TB and 1.3 million deaths in 2017 alone (1). Antibiotic  
62 treatment regimens are long and multi-drug resistant (MDR) and extensive-drug resistant (XDR)  
63 *Mycobacterium tuberculosis* (Mtb) strains have emerged, complicating treatment. Even those  
64 patients that are cured of the infection can suffer permanent deficits in lung function that result  
65 from inflammation and fibrosis (2). Host-directed therapies (HDTs) have been proposed as a  
66 potential option for improving therapy. Depending on the strategy, HDTs can function to  
67 enhance antimicrobial immune responses and shorten therapy, or inhibit pathological  
68 inflammation (3). Since HDTs would be used as part of a multi-drug regimen, targeting  
69 mechanisms that increase drug exposure or decrease toxicity are also possible. While some  
70 HDT strategies hold promise, very few have been rigorously tested in pre-clinical models (4).  
71  
72 Interleukin-1 (IL-1) has been implicated in TB disease severity and inflammation, making it a  
73 possible target of HDT. This cytokine plays an important yet complicated role in TB disease  
74 progression. The susceptibility of mice lacking critical mediators of IL-1 signaling indicates that  
75 initial production of IL-1 upon Mtb infection is essential for establishing protective immune  
76 responses necessary for disease control (5-8). In contrast, IL-1 production is regulated after the  
77 onset of adaptive immunity, via multiple mechanisms including IFN $\gamma$  production(8), which acts  
78 via the induction of nitric oxide synthase 2 (NOS2)-dependent nitric oxide to inhibit IL-1 $\beta$   
79 processing(9). Persistent IL-1 signaling can contribute to the accumulation of disease-  
80 promoting neutrophils in susceptible mice, and genetic variants that result in higher IL-  
81 1 $\beta$  production are associated with increased disease severity and neutrophil accumulation in  
82 humans (9-11). Given that HDT is designed to be administered to chronically infected patients

83 during treatment when persistent IL-1 production can play a pathological role, it could be  
84 beneficial to block the inflammation and disease promoting activities of this cytokine.  
85  
86 IL-1 may also play a role in the toxicity of linezolid (LZD), an increasingly important antibiotic for  
87 the treatment of drug-resistant TB, highlighted by its recent inclusion in a newly approved  
88 therapy for MDR-TB (12). While LZD has shown efficacy against XDR and MDR-TB, its wide-  
89 spread use has been limited by severe host toxicities that occur after more than 4 weeks of  
90 treatment (13, 14). Over the 6-20 month treatment course necessary to treat resistant TB, both  
91 reversible bone marrow suppression and irreversible neuropathies are common clinical  
92 manifestations (15). LZD-associated toxicities are generally attributed to the inhibition of  
93 mitochondrial translation and LZD-mediated bone marrow suppression is promoted by the  
94 subsequent mitochondrial damage. This damage acts on the NOD-like receptor family, pyrin  
95 domain containing 3 (NLRP3) protein that has been shown to be necessary for LZD-mediated  
96 bone marrow suppression in mice (16). NLRP3 forms an inflammasome complex containing  
97 caspase-1, which cleaves a number of substrates resulting in cell death and/or the release of  
98 active of IL-1 $\beta$ . While the importance of NLRP3 in bone marrow suppression is clear, the  
99 relative roles of inflammasome activation and IL-1 signaling remain uncertain.

100

101 Based on these studies, inhibiting the IL-1 pathway as a potential HDT could serve two  
102 purposes: first, to alleviate LZD-associated host toxicity and second, to reduce the pathology  
103 associated with unchecked IL-1 signaling during TB disease. Due to the pro-inflammatory  
104 nature of the IL-1 pathway, strict regulatory mechanisms exist within the host to quell this  
105 pathway. IL-1 receptor antagonist (IL-1Rn) is a protein produced constitutively at low levels that  
106 can increase in response to a variety of cytokine signals. IL-1Rn serves as a decoy ligand for  
107 the IL-1 receptor type 1 (IL-1R1), blocking signal transduction and subduing activation of  
108 downstream pro-inflammatory pathways (17). Anakinra is an FDA-approved recombinant IL-

109 1Rn that is used to treat rheumatoid arthritis and other inflammatory disorders. As there are no  
110 FDA approved drugs to inhibit inflammasome activation, inhibition of the IL-1 pathway with  
111 biologics like Anakinra is currently the only feasible strategy to modulate this pathway in  
112 humans (18).

113  
114 We hypothesized that the combination of Anakinra (herein referred to as IL-1Rn) with LZD for  
115 treatment of active TB disease would reduce LZD-associated toxicities and host inflammation.  
116 While there is little rationale to expect IL-1 blockade to enhance bacterial clearance by the  
117 antibiotic, suppression of both inflammation and LZD toxicity could provide a significant benefit.  
118 To test this concept, we employed two established TB animal models to assess differing  
119 aspects of host responses to LZD and IL-1R1 blockade. We used multiple strains of mice to  
120 model distinct disease states and dissect the relative importance of the inflammasome and IL-1  
121 signaling in evaluating HDT efficacy. As a translational model, we used cynomolgus macaques  
122 in combination with [<sup>18</sup>F] FDG PET CT serial imaging to track TB disease progression, including  
123 inflammation, before and during drug regimens (19). Cynomolgus macaques present a similar  
124 spectrum of Mtb infection as humans with pathology, granuloma structure and diversity, that  
125 recapitulates human TB (20-22). Importantly, we designed our study in macaques to reflect  
126 clinical standards, adhering to FDA guidelines for dosage and time frame of LZD and IL-1Rn  
127 administration. Together, our data indicate that IL-1 blockade alleviates LZD-mediated bone  
128 marrow (BM) suppression in mice and may accelerate the resolution of inflammation in both  
129 mice and macaques with TB.

130

## 131 **Materials and Methods**

### 132 **Ethics Statement**

133 All experimental manipulations, protocols, and care of the animals were approved by

134 the University of Pittsburgh School of Medicine Institutional Animal Care and Use  
135 Committee (IACUC). The protocol assurance number for our IACUC is A3187-01. Our  
136 specific protocol approval numbers for this project are 15117082, 16017370, 18124275,  
137 13011368 and 16027525. The IACUC adheres to national guidelines established in the  
138 Animal Welfare Act (7 U.S.C. Sections 2131 - 2159) and the Guide for the Care and  
139 Use of Laboratory Animals (8<sup>th</sup> Edition) as mandated by the U.S. Public Health Service  
140 Policy.

141 All macaques used in this study were housed at the University of Pittsburgh in rooms  
142 with autonomously controlled temperature, humidity, and lighting. Animals were singly  
143 housed in caging at least 2 square meters that allowed visual and tactile contact with  
144 neighboring conspecifics. The macaques were fed twice daily with biscuits formulated  
145 for nonhuman primates, supplemented at least 4 days/week with large pieces of fresh  
146 fruits or vegetables. Animals had access to water *ad libitem*. Because our macaques  
147 were singly housed due to the infectious nature of these studies, an enhanced  
148 enrichment plan was designed and overseen by our nonhuman primate enrichment  
149 specialist. This plan has three components. First, species-specific behaviors are  
150 encouraged. All animals have access to toys and other manipulata, some of which will  
151 be filled with food treats (e.g. frozen fruit, peanut butter, etc.). These are rotated on a  
152 regular basis. Puzzle feeders foraging boards, and cardboard tubes containing small  
153 food items also are placed in the cage to stimulate foraging behaviors. Adjustable  
154 mirrors accessible to the animals stimulate interaction between animals. Second,  
155 routine interaction between humans and macaques are encouraged. These interactions  
156 occur daily and consist mainly of small food objects offered as enrichment and adhere

157 to established safety protocols. Animal caretakers are encouraged to interact with the  
158 animals (by talking or with facial expressions) while performing tasks in the housing  
159 area. Routine procedures (e.g. feeding, cage cleaning, etc) are done on a strict  
160 schedule to allow the animals to acclimate to a routine daily schedule. Third, all  
161 macaques are provided with a variety of visual and auditory stimulation. Housing areas  
162 contain either radios or TV/video equipment that play cartoons or other formats  
163 designed for children for at least 3 hours each day. The videos and radios are rotated  
164 between animal rooms so that the same enrichment is not played repetitively for the  
165 same group of animals.

166 All animals are checked at least twice daily to assess appetite, attitude, activity  
167 level, hydration status, etc. Following *M. tuberculosis* infection, the animals are  
168 monitored closely for evidence of disease (e.g., anorexia, weight loss, tachypnea,  
169 dyspnea, coughing). Physical exams, including weights, are performed on a regular  
170 basis. Animals are sedated prior to all veterinary procedures (e.g. blood draws, etc.)  
171 using ketamine or other approved drugs. Regular PET/CT imaging is conducted on  
172 most of our macaques following infection and has proved very useful for monitoring  
173 disease progression. Our veterinary technicians monitor animals especially closely for  
174 any signs of pain or distress. If any are noted, appropriate supportive care (e.g. dietary  
175 supplementation, rehydration) and clinical treatments (analgesics) are given. Any  
176 animal considered to have advanced disease or intractable pain or distress from any  
177 cause is sedated with ketamine and then humanely euthanatized using sodium  
178 pentobarbital.

179

180

181 **Mice, infection and treatment**

182 C57BL/6 (stock no. 000664), *Nos2*<sup>-/-</sup> (B6.129P2-*Nos2*<sup>tm1Lau</sup>/J, stock no. 002609), C3HeB/FeJ  
183 (stock no. 00658), and *Nlrp3*<sup>-/-</sup> (B6.129S6-*Nlrp3*<sup>tm1Bhk</sup>/J, stock no. 021302) were purchased from  
184 the Jackson Laboratory. Breeding pairs of Caspase-1/11 double knock out mice were kindly  
185 provided by Prof. Katherine Fitzgerald of the Department of Infectious Diseases at University of  
186 Massachusetts (UMASS) Medical School and bred in house. Mice were housed under specific  
187 pathogen-free conditions, and in accordance with the UMASS Medical School, IACUC  
188 guidelines. All mouse strains used in this study were of C57BL/6 background unless otherwise  
189 indicated.

190

191 The wild type strain of *M. tuberculosis* (Mtb) Erdman was used in these studies. Bacteria were  
192 cultured in 7H9 medium containing 0.05% Tween 80 and OADC enrichment (Becton Dickinson).  
193 For infections, mycobacteria were suspended in phosphate-buffered saline (PBS)-Tween 80  
194 (0.05%); clumps were dissociated by sonication, and ~100 CFU were delivered via the  
195 respiratory route using an aerosol generation device (Glas-Col, Terre Haute, IN). At indicated  
196 time points mice were treated with 200mg/kg of Linezolid (LZD). These drugs were prepared in  
197 0.5% carboxymethyl cellulose (CMC) and Polyethylene glycol 300 solution as the vehicle.  
198 Cohorts of mice were treated with anti-IL-1R1 antibody (InVivoMab, anti-mouse IL-1R, Clone  
199 JAMA147, BioXcell), either alone or in combination with LZD. 0.5% CMC and Polyethylene  
200 glycol was used as vehicle control. All antibiotic treatment was done by daily oral gavage. Anti-  
201 IL-1R1 (100ug/mouse/0.2mL) was administered every alternate day by subcutaneous and  
202 intraperitoneal route.

203

204 **Macaque pharmacokinetic study and analytical method.**

205 Uninfected macaques designated for other studies (n=3) were given 20mg/kg or 40mg/kg by  
206 oral gavage and plasma acquired at 0, 5, 19, 15, 20, 25 and 30 hours post LZD administration.



207 High pressure liquid chromatography coupled to tandem mass spectrometry (LC/MS-MS)  
208 analysis was performed on a Sciex Applied Biosystems Qtrap 4000 triple-quadrupole mass  
209 spectrometer coupled to an Agilent 1260 HPLC system to quantify LZD in macaque plasma.  
210 LZD chromatography was performed on an Agilent Zorbax SB-C8 column (2.1x30 mm; particle  
211 size, 3.5  $\mu$ m) using a reverse phase gradient elution. Milli-Q deionized water with 0.1% formic  
212 acid was used for the aqueous mobile phase and 0.1% formic acid in acetonitrile for the organic  
213 mobile phase. Multiple-reaction monitoring (MRM) of parent/daughter transitions in electrospray  
214 positive-ionization mode was used to quantify the analytes. Sample analysis was accepted if  
215 the concentrations of the quality control samples were within 20% of the nominal concentration.  
216 Data processing was performed using Analyst software (version 1.6.2; Applied Biosystems  
217 Sciex).  
218 Neat 1 mg/mL DMSO stocks for all compounds were serial diluted in 50/50 Acetonitrile water to  
219 create standard curves and quality control spiking solutions. 20  $\mu$ L of neat spiking solutions  
220 were added to 20  $\mu$ L of drug free plasma or control tissue homogenate, and extraction was  
221 performed by adding 180  $\mu$ L of Acetonitrile/Methanol 50/50 protein precipitation solvent  
222 containing the internal standard (10 ng/mL verapamil & deuterated LZD-d3). Extracts were  
223 vortexed for 5 minutes and centrifuged at 4000 RPM for 5 minutes. 100  $\mu$ L of supernatant was  
224 transferred for LC-MS/MS analysis and diluted with 100  $\mu$ L of Milli-Q deionized water.  
225 Rhesus macaque plasma (Lithium Heparin, Bioreclamation IVT, NY) was used as a surrogate to  
226 cynomolgus macaque plasma to build standard curves. LZD-d3 internal standard and verapamil  
227 were purchased from Toronto Research Chemical. The lower and upper limits of quantitation  
228 (LLOQ and ULOQ) were 1 ng/mL and 50,000 ng/mL respectively. The following MRM  
229 transitions were used for LZD (338.00/235.00), LZD-d3(341.20/297.20), and verapamil  
230 (455.40/165.20).

231

232 **Macaques, infection and treatment**

233 All housing, care, and experimental procedures were approved by the University of Pittsburgh  
234 School of Medicine Institutional Animal Care and Use Committee (IACUC). Examination of  
235 animals was performed in quarantine to assess physical health and confirmation of no previous  
236 *M. tuberculosis* infections as previously described (23). Cynomolgus macaques (*Macaca*  
237 *fascicularis*) (N=10) were purchased for this study from (Valley Biosystems). Bone marrow  
238 control (non-drug treated) samples were taken from Mtb-infected cynomolgus macaques in  
239 unrelated ongoing studies (N=5). For the current study, all 10 animals were infected  
240 bronchoscopically with 12 CFU of Mtb strain Erdman. After active disease developed (3-5  
241 months), NHPs were randomized to LZD only (N=5) or LZD+IL-1Rn (N=5) treatment groups. For  
242 randomization, macaques were paired based on total FDG activity in lungs (a surrogate for total  
243 thoracic CFU), and then assigned to treatment by coin flip (20). LZD was administered twice a  
244 day orally with food (30mg/kg), while IL1-Rn was given at 2mg/kg once each day by  
245 subcutaneous injection. All animal data are provided in Supplementary Table 1. Medication  
246 compliancy was monitored at every administration and pharmacokinetic analysis performed at  
247 select times. Drug treatments were administered for 4 weeks prior to necropsy.  
248 Bronchoalveolar lavages (BAL) were performed prior to drug-treatment and 3 weeks-post start  
249 of treatment for CFU, flow cytometry and multiplex assays.

250

### 251 **Macaque PET/CT Imaging**

252 Positron emission tomography (PET) with computed tomography (CT) imaging was performed  
253 with 2-deoxy-2-[<sup>18</sup>F]-D-deoxyglucose (FDG) throughout the study as previously described (19).  
254 Serial scans were performed throughout the study to track disease progression and changes  
255 during drug treatment. Total FDG activity of the lungs was measured over the course of  
256 infection and drug treatment as previously described (19). Granulomas identified on scans were  
257 denoted, measured (mm) and standard uptake values (SUVr) were determined to assess  
258 metabolic activity, a readout for inflammation. SUVr values were normalized to muscle and

259 SUVR and size measurements were determined at each scan over time to compare pre-and  
260 post-drug treatment. Each animal was scanned prior to necropsy to identify granulomas for  
261 matching at necropsy; granulomas  $\geq 1$ mm are distinguishable by PET/CT.

262

### 263 **Macaque Necropsy**

264 Necropsies were performed as previously described. In short, multiple tissues (granulomas,  
265 lung lobes, thoracic lymph nodes, peripheral lymph nodes, liver, spleen, bone marrow) were  
266 excised and homogenized into single-cell suspensions for assessment of bacterial burden and  
267 immunological assays. Granulomas were individually excised (PET/CT identified and others not  
268 identified on scans) and split (size permitting) with one-half for homogenization and single cell  
269 suspension and the other half processed for histological analysis. Bone marrow samples were  
270 obtained from the sternum, with a portion sent for histological analysis while single cell  
271 suspensions were acquired as previously described (24). Bacterial burden was assessed from  
272 each tissue by plating serial dilutions on 7H11 agar plates and incubated at 37°C in 5% CO<sub>2</sub> for  
273 21 days before enumeration of Mtb CFU.

274

### 275 **Flow cytometry and Immunoassays**

276 **Mice.** Single cell suspensions were prepared from the infected mouse organs. Briefly, lung  
277 tissue was digested with Collagenase type IV/DNaseI and passed through 40  $\mu$ m cell strainers  
278 to obtain single cell suspension. Red blood cells were lysed using Tris-buffered Ammonium  
279 Chloride (ACT) Non-specific antibody binding sites were blocked by Fc-Block CD16/32 (Clone  
280 93, cat. no. 101319) and the cells were stained with anti-CD3-PE (Clone 17A2, cat. no.  
281 100205), anti-CD11b-PerCP Cy5.5 (Clone M1/70, cat. no.101227), anti-Ly-6G-FITC (Clone  
282 1A8, cat. no.127605), anti-Ly-6C-PE (Clone HK1.4, cat. no.128007), anti-Gr1-APC (Clone RB6-  
283 8C5, cat. no.108411), anti-Ter119-PE (Clone TER119, cat. no.116208), anti-CD71-FITC (clone

284 RI7217, cat. no. 113806). Antibodies were purchased from BioLegend. All analyses were  
285 performed on live cells only after staining them with fixable live dead stain conjugated with  
286 eFlour780, purchased from eBiosciences. All the staining was done according to the  
287 manufacturer's instructions. Lung, spleen and bone marrow cells were surface stained for 30  
288 minutes at room temperature, fixed for 20 minutes at 4°C using the Cytotfix buffer (BD-  
289 Biosciences, cat. no. 554655). Data were acquired in a BD LSRII flow cytometer in the flow  
290 cytometry core facility at UMASS medical school and analyzed with FlowJo Software (Treestar,  
291 Inc.). Gating strategies are provided in applicable figures.

292 **Macaques.** Single cell suspensions acquired from homogenization of granulomas, lung lobes  
293 and lymph nodes were subjected to intracellular cytokine staining (ICS). Prior to staining, cells  
294 were incubated in RPMI 1640 containing 1% HEPES, 1% L-glutamine, 10% human AB serum,  
295 and 0.1% brefeldin A (Golgiplug; BD Biosciences) for 3 h at 37°C in 5% CO<sub>2</sub>. After viability  
296 staining (Invitrogen), surface antigens and intracellular cytokines were assessed using standard  
297 protocols. Surface markers include CD3 (SP34-2; BD Pharmingen), CD4 (L200; BD Horizon),  
298 CD8 (RPA-T8; BD Horizon) for T cells and CD11b (ICRF44; BD Pharmingen), CD206 (19.2; BE  
299 Pharmingen) for macrophages/neutrophils. Calprotectin (27E10; ThermoFisher) was stained  
300 intracellularly to identify neutrophils. For bone marrow, single cell suspensions underwent red  
301 blood cell lysis (BD Pharm Lyse) before incubation in alpha-MEM + 10% Stasis™ FBS (Gemini  
302 Bio-Products) + MitoTracker™ Red CMXRos (Invitrogen) for 30 minutes to stain for membrane  
303 potential of mitochondria. Cells were then stained for viability (Invitrogen) and surface stained  
304 to distinguish erythroid progenitor populations by CD34 (581; Biolegend), CD235a (HIR2; BD  
305 Pharmingen), CD71 (L01.1; BD Pharmingen) and CD45 (D058-1283; BD Pharmingen). All  
306 samples were acquired on an LSR II (BD) and analyzed with FlowJo Software (Treestar, Inc.).  
307 Gating strategies are provided in applicable figures.

308 For the multiplex assays, all samples and supernatants were stored at -80°C from time of  
309 necropsy until time of assay. Five representative granuloma supernatants were randomly

310 selected from each animal using JMP Pro v12 (SAS Institute Inc.). Supernatants were thawed  
311 and filtered with a 0.22µm syringe filter to remove infectious bacteria and debris, then kept on  
312 ice throughout the assay. For BAL samples, supernatants were concentrated using regenerated  
313 cellulose centrifugal filter tubes (3,000 NMWL, Millipore Sigma) to a final 10X concentration  
314 (5mL to 0.5mL). Both granuloma and BAL supernatants were evaluated with a ProcartaPlex  
315 multiplex immunoassay (Invitrogen) that assesses thirty cytokines and chemokines specific for  
316 NHPs. We followed the manufacturer's protocol with one modification in which we diluted the  
317 standard out an extra dilution to increase the range of detection. Results were analyzed by a  
318 BioPlex reader (BioRad).

319

## 320 **Histopathology and immunofluorescence**

321 **Mice.** Lung tissues were fixed in 10% buffered formalin and embedded in paraffin. Five  
322 micrometer-thick sections were stained with hematoxylin and eosin (H&E). Tissue staining was  
323 done by the Diabetes and Endocrinology Research Center histopathology core facility at the  
324 University of Massachusetts Medical School or immunology core facility of Albany medical  
325 college, NY. Brightfield images were acquired in Abaxis VETSCAN HD microscope.

326 Paraffin embedded lung tissue sections were cut at 5 µm thickness, mounted on ultraclean  
327 glass slides covered in silane, deparaffinized, then dehydrated and rehydrated using the  
328 following steps: Ethanol solutions (30, 50, 70, 90, 95 and 100 % for 3 min each), xylenes (2  
329 different solutions for 10 min each) and ethanol solutions (100, 95, 90, 70, 50 and 30 for 3 min  
330 each). The slides were washed once in Tris buffer saline (TBS) for 5 min. Slices were subjected  
331 to antigen retrieval by boiling in sodium citrate buffer at pH=6.0 for 20 min and incubated in  
332 0.1% Triton-X 100 for 5 min. Slices were removed and allowed to equilibrate to room  
333 temperature for at least 20 min and rinsed with distilled water. Tissue sections were blocked  
334 (blocking solution; 0.5 M EDTA, 1% BSA, in PBS) and incubated overnight in primary antibodies  
335 against the proteins related to our studies. Sections were stained for nuclei (DAPI, blue

336 staining), anti-mouse CD3e (cat.no. ab16669, green staining), anti-mouse Ly-6G (clone 1A8,  
337 cat. no. 127602) to identify neutrophil granulocytes (Cy3, red staining). As controls, pre-immune  
338 serum and isotype matched controls were used. After incubation, the tissues were washed  
339 several times with sterile TBS at room temperature and incubated in the respective secondary  
340 antibodies (anti-rabbit conjugated to Alexa-488, anti-rat conjugated to Cy3) for at least 2h at  
341 room temperature. Tissue sections were mounted using Prolong Gold Antifade reagent  
342 (Invitrogen, Grand Island, NY) with DAPI, and the tissue sections were examined in ECHO  
343 Revolve 4 microscope. Isotype matched control antibodies were used for checking antibody  
344 specificity.

345 **Macaques.** As previously described, samples acquired at necropsy were formalin fixed,  
346 paraffin embedded, cut into ~5µm serial sections and stained with H&E (23). A study-blinded  
347 veterinary pathologist assessed and characterized each granuloma, indicating size, type,  
348 distribution and cellular composition. Sterna for bone marrow analysis were excised and  
349 formalin fixed then transected longitudinally into 1 to 2 sternebal unites and placed in Cal-Ex  
350 Hydrochloric acid decalcification solution for 2-4 hours. Upon removal, specimens were washed  
351 and trimmed to test for adequate mineral removal, then submitted for routine tissue processing  
352 with other tissue specimens as described above.

353

### 354 **Statistical Analysis**

355 **Mouse studies:** Equal variance between samples was assessed by Brown-Forsythe test.  
356 Experiments in which variances were equivalent were analyzed by one-way ANOVA with  
357 Sidak's multiple comparisons test. Those with unequal variances were analyzed by Welch  
358 ANOVA and Dunnett's multiple comparisons test. P values < 0.05 was considered significant.

359 **Macaque studies:** Nonparametric U tests (Mann-Whitney) were performed for two-group  
360 comparisons and Kruskal-Wallis tests were performed for three-group comparisons as indicated  
361 on data sets with non-normal distributions. Wilcoxon signed rank tests were performed for

362 matched pairs. Fisher's exact test was run on any categorical data. P values < 0.05 were  
363 considered significant. Total lung FDG activity was log<sub>10</sub>-transformed. Note that for any log-  
364 transformed data, a log<sub>10</sub>(x + 1) transform was implemented so that zeroes were not excluded  
365 from the graphs or analyses. A two-way ANOVA was utilized to test whether treatment or time  
366 (or an interaction between these factors) had an effect on total lung inflammation. Time was  
367 found to be a statistically significant effect (p=0.0046); therefore, Dunnett's multiple comparison  
368 tests were then used to compare each time point to pre-drug treatment within each treatment  
369 group. For bivariate data, a linear regression was used to test the linear relationship between  
370 the variables and the R<sup>2</sup> and p-value for the F-test are reported in the accompanying figure  
371 legend. Statistical analyses were performed in GraphPad Prism 8 (GraphPad Software, San  
372 Diego, CA). A regression equation created from control animals from previous studies was  
373 used to create a 95% prediction interval for total thoracic bacterial burden using total lung FDG  
374 activity on the scan just before drug treatment (20). The lower and upper bounds and the mean  
375 of this prediction interval were subtracted from each animal's total CFU to estimate change in  
376 CFU over the course drug treatment. All statistical analyses are referenced in the  
377 corresponding figure legends.

378

379

## 380 **Results**

### 381 **IL-1 receptor blockade reduces inflammation in mouse models of TB disease.**

382 Given the complex role played by IL-1 during TB, we initially sought to determine the effect of  
383 inhibiting this cytokine during TB disease in mice. We used a blocking antibody to the murine  
384 IL-1 receptor type 1 (αIL-1R1) since this reagent has been shown to alter TB disease in mice  
385 (25), and we previously found that recombinant human IL-1Rn (Anakinra) has little effect in this  
386 mouse model. Two mouse strains were employed to assess the effects of these treatments in

387 animals with different amounts of IL-1 activity. In relatively resistant C57BL/6 animals, mature  
388 IL-1 production is controlled by IFN $\gamma$ -dependent nitric oxide production, whereas unregulated IL-  
389 1 drives inflammatory disease characterized by increased number of neutrophils (PMNs),  
390 bacterial burden (CFU) in the lungs and significant weight loss observed in Mtb-infected *Nos2*<sup>-/-</sup>  
391 mice that lack this regulatory pathway (9, 10).  
392  $\alpha$ IL-1R1 was administered to the animals between days 14 and 28 post infection after the onset  
393 of adaptive immunity. In both resistant (C57BL/6) and susceptible (*Nos2*<sup>-/-</sup>) mice,  $\alpha$ IL-1R1  
394 treatment significantly reduced PMN numbers in the lungs. In addition, this treatment reversed  
395 the weight loss observed in *Nos2*<sup>-/-</sup> animals (Fig. 1A-B). Somewhat surprisingly, this regimen  
396 also modestly reduced the mean bacterial burden in lungs and spleens, with this reduction  
397 meeting statistical significance in the spleens of *Nos2*<sup>-/-</sup> mice (Fig. 1C-D). This generally  
398 beneficial effect of  $\alpha$ IL-1R1 treatment was consistent with qualitatively improved  
399 histopathological disease (Fig. 1E). By no metric did this  $\alpha$ IL-1R1 treatment exacerbate disease  
400 in either mouse strain.

401

402 **IL-1 blockade alleviates lung inflammation and hematopoietic suppression during LZD**  
403 **treatment in mice.**

404 The IL-1R1 blocking antibody was next tested in combination with LZD to determine whether the  
405 efficacy or toxicity of the antibiotic was altered. C3HeB/FeJ mice, which are relatively  
406 susceptible to Mtb and develop histopathological lesions that more closely resemble human  
407 disease, were used for these studies. To model established disease, mice were treated  
408 between days 28 and 46 post-infection with vehicle alone, LZD,  $\alpha$ IL-1R1 or a combination of the  
409 two. As previously reported, LZD was effective in this model, reducing lung neutrophil numbers,  
410 bacterial burden and weight loss (Fig. 2 A-D) (26). The addition of  $\alpha$ IL-1R1 to this regimen  
411 further reduced lung neutrophil numbers. IL-1 blockade had very little effect on bacterial



412 burdens in lung or spleen, whether given alone or in conjunction with LZD. The mean CFU  
413 burden in  $\alpha$ IL-1R1-treated animals was within 2.3-fold of the untreated groups, and only the  $\alpha$ IL-  
414 1R1-associated decrease in the spleens of LZD treated animals approached significance. As  
415 IL-1 $\beta$  production in response to both Mtb infection (9) and LZD treatment (16) depends largely  
416 on the NLRP3 inflammasome, we also investigated a regimen in which LZD and a small  
417 molecule NLRP3 inhibitor (MCC950) was administered between days 56 and 77 post-infection.  
418 As observed with  $\alpha$ IL-1R1, the addition of MCC950 reduced PMN numbers in the lung, relative  
419 to LZD alone, and did not significantly alter bacterial killing (Fig. 2 E-G). Using a more rapid  
420 treatment protocol and C57BL/6 mice with genetic deficiencies in Caspase 1 or NLRP3, we  
421 confirmed that the antimicrobial activity of LZD was unaffected by inflammasome activation  
422 (Supplementary Fig. 1A-D). Mice were treated between days 14 and 28 post-infection and the  
423 effect of LZD on bacterial burden and lung neutrophil number was at least as large in the  
424 knockout animals as the wild type controls.

425  
426 Next, we evaluated the hematopoietic suppression caused due to LZD treatment in the bone  
427 marrow and spleens of C3HeB/FeJ mice. In small animals, bone marrow serves as the primary  
428 site of hematopoiesis, but during infection or stress, the spleen functions as an extramedullary  
429 hematopoietic organ to compensate for the increasing demand of blood cells in the  
430 periphery(27). As LZD did not alter the myeloid cells in the bone marrow (data not shown), and  
431 previous reports have shown its effects on erythropoiesis (16), we investigated the effect of this  
432 oxazolidinone on erythroid lineage cells in both these organs. Using flow cytometry, erythroid  
433 progenitors can be divided into a progression of precursors: pro-erythrocyte (ProE), EryA, EryB,  
434 and EryC (Fig. 3A). These populations were quantified in each tissue of Mtb-infected animals  
435 treated with LZD and/or  $\alpha$ IL-1R1. In both bone marrow and spleen, LZD had a profound effect,  
436 nearly eliminating early erythroid progenitors of the ProE, EryA and EryB classes (Fig. 3B-E).

437 Simultaneous treatment with  $\alpha$ IL-1R1 largely reversed the effect of LZD in the spleen, restoring  
438 these immature precursors to approximately half of their untreated levels. While  $\alpha$ IL-1R1 also  
439 significantly increased the number of erythroid precursors in the BM, the suppression of LZD  
440 toxicity was less pronounced at this site.

441  
442 In sum, studies in the mouse model indicated that the addition of  $\alpha$ IL-1R1 to an LZD regimen  
443 could reduce the number of lungs PMN and ameliorate hematopoietic toxicity, while not  
444 compromising antimicrobial activity. These observations justified further studies in a non-human  
445 primate model.

446

#### 447 **Changes in TB disease in macaques treated with LZD and HDT by PET/CT**

448 Previously we published the efficacy and pharmacokinetics of LZD in cynomolgus macaques  
449 treated for 8 weeks with a single daily dose of 30 mg/kg (14). To adhere to FDA guidelines for  
450 LZD administration at the time we initiated this study and reproduce clinical exposure at 600 mg  
451 twice daily (b.i.d.), we shortened treatment duration to 4 weeks and increased the dosing  
452 frequency to 30 mg/kg b.i.d. Dose finding studies were carried out in uninfected cynomolgus  
453 macaques to ensure that adequate drug concentrations similar to those achieved in patients at  
454 600 mg b.i.d. were reached in the blood (Supplementary Fig. 2).

455

456 To assess this LZD regimen and HDT with IL-1Rn, we infected 10 cynomolgus macaques with  
457 Mtb strain Erdman and monitored development of active TB disease (Supplementary Table 1  
458 and Supplementary Fig. 2). Infected macaques were then randomized to a 4-week drug  
459 regimen of LZD (n=5) or LZD+IL-1Rn (n=5) (Supplementary Fig. 2). Our model has the  
460 advantage of tracking disease progression throughout infection and treatment using serial  $^{18}$ F-  
461 FDG PET CT scans (14, 28). Lung inflammation quantified by total FDG activity in the lungs is

462 correlated with total thoracic bacterial burden as previously described (19). Here we quantified  
463 total lung FDG activity before and during treatment. 3D rendered images provide a visual for  
464 changes in overall lung inflammation in the “best” and “worst” animals for both treatment groups  
465 (Fig. 4A). Quantification of total lung FDG showed no significant difference in inflammation at  
466 time of necropsy between LZD and LZD+IL-1Rn treatment groups (Fig. 4B), however a slight  
467 change in slope with IL-1Rn treatment was observed. To expand on this finding and test if  
468 LZD+IL-1Rn reduced total lung FDG activity more effectively than LZD alone over time, we  
469 compared the change in FDG activity between 0, 2 and 4 weeks post treatment. In LZD only  
470 treated macaques, there was no significant decrease in total lung FDG activity after 2  
471 ( $p=0.0857$ ) and 4 weeks of treatment ( $p=0.2876$ ) (Fig. 4B). In contrast, LZD+IL-1Rn treatment  
472 resulted in a significant reduction in total lung FDG activity after 2 and 4 weeks ( $p=0.0242$ ,  
473  $p=0.0237$  respectively). To assess whether these changes in lung inflammation were reflected  
474 in individual granulomas, we used PET CT scans acquired pre-treatment and at 4 weeks post-  
475 treatment to determine changes in granuloma physical size (mm) and metabolic activity as  
476 Standard Uptake Value (SUVr) of FDG per granuloma (Fig. 4C-D) (19). SUVr indicates the  
477 inflammatory state of each individual granuloma, allowing us to track specific lesions throughout  
478 treatment for changes in activity. After treatment, while the majority of granulomas decreased in  
479 size and SUVr, there was variability within an animal and between animals and no significant  
480 differences between LZD and LZD+IL1-Rn treated animals. These data indicate that blocking of  
481 IL-1R in combination with LZD reduces total lung inflammation more efficiently than LZD alone.

482

### 483 **Addition of IL-1Rn does not alter LZD bacterial clearance**

484 IL-1Rn does not have direct bactericidal activity, therefore addition of IL-1Rn to LZD treatment  
485 should not directly influence bacterial killing and burden. However, to ensure  
486 immunomodulation with IL-1Rn did not have detrimental effects on host antibacterial immune  
487 responses, we performed comprehensive bacterial burden analysis at necropsy as previously

488 described (20). In short, we acquired individual granulomas identified by PET CT as well as  
489 other TB pathologies, thoracic lymph nodes, uninvolved lung tissue and extrapulmonary lesions  
490 for bacterial plating and CFU determination. Total thoracic CFU (lung + lymph nodes) was not  
491 significantly different between LZD and LZD + IL-1Rn in macaques ( $p = 0.1508$ ). Similarly,  
492 separate analysis of lung CFU excluding thoracic lymph nodes did not demonstrate significant  
493 differences between groups ( $p=0.5476$ ) (Fig. 5A). We did not have untreated control macaques  
494 available in this study, therefore we provide total thoracic CFU for 3 historical control animals  
495 that were similarly infected and necropsied at a similar time point; these data serve as reference  
496 for expected CFU at this time point and were not included in statistical analyses. While the  
497 treatment groups had similar frequencies of sterilized granulomas (LZD = 68.42%, LZD+IL-1Rn  
498 = 72.22%), it is important to note that the majority of granulomas were sterilized during the short  
499 four-week course of LZD or LZD+IL-1Rn treatment. We previously reported that a 2-month  
500 lower dose regimen of LZD could reduce bacterial burden compared to untreated controls, with  
501 ~80% sterilized granulomas in treated animals and ~20% sterilized in untreated (14). This  
502 supports that high dose LZD as a single drug is effective at killing bacteria even in a short (4  
503 week) regimen. The lymph nodes are a recently identified reservoir for Mtb and a hub for  
504 immune cell interactions (29), therefore we assessed HDT effects on bacterial burden in  
505 thoracic lymph nodes after treatment. We saw no significant difference in overall lymph node  
506 CFU nor CFU per lymph node (Fig. 5C), indicating addition of IL-1Rn did not measurably alter  
507 LZD efficacy or antibacterial immunity in lymph nodes. To better understand the efficacy of high  
508 dose LZD for 4 weeks, we estimated the pre-treatment total thoracic CFU for each macaque  
509 using the total lung FDG by PET CT as previously described (20), and compared the true  
510 bacterial burden post-treatment against the estimated pre-treatment value. This analysis allows  
511 us to estimate the magnitude of LZD bacterial killing during LZD and LZD+IL-1Rn treatment. All  
512 macaques had lower total thoracic CFU at necropsy compared to the estimated total thoracic  
513 CFU prior to treatment start and on average the total CFU was ~100-fold lower than estimated

514 CFU prior to treatment (Fig. 5D). Our data indicate that while IL-1Rn did not significantly  
515 enhance bacterial killing, it did not impair LZD-mediated bacterial clearance, an important  
516 observation for HDT development.

517

### 518 **Lack of LZD-induced bone marrow suppression in macaques**

519 In humans, LZD is associated with host toxicities during extended treatment periods of greater  
520 than 4 weeks (30) resulting in the FDA limitation of LZD to less than 4 weeks for most  
521 indications. We designed our study in macaques to follow FDA-guidelines for transition to  
522 possible human trials, therefore the potential for bone marrow toxicity to occur within this  
523 timeframe in macaques was unknown. To determine whether bone marrow suppression  
524 occurred during the 4-week high dose LZD therapy and whether IL-1Rn could modulate any  
525 observable host toxicities, we isolated bone marrow at necropsy from the sternum of each  
526 macaque and assessed erythropoietic progenitor populations and mitochondrial function by flow  
527 cytometry (Fig. 6A). During homeostatic erythropoiesis, a 1:8 ratio is maintained between ProE  
528 and EryC progenitor populations. Changes in this ratio can be used to indicate disruption of  
529 erythropoiesis. In macaques, there was no significant difference in ProE:EryC ratios between  
530 the treatment groups (Fig. 6B). We also analyzed control bone marrow from untreated Mtb-  
531 infected macaques involved in other on-going studies (TB only), which showed no significant  
532 difference between ProE:EryC ratios compared to treatment groups. To determine whether LZD  
533 was affecting mitochondrial function, we stained bone marrow cells with MitoTracker™ Red  
534 CMXRos which only stains mitochondria with active membrane potential, indicating function of  
535 those organelles (Fig. 6B). Regardless of treatment, the MitoTracker MFI remained similar,  
536 indicating that mitochondrial function is the same among groups. To confirm our observations,  
537 a pathologist evaluated bone marrow tissue sections and found no observable differences  
538 between TB only, LZD and LZD+IL-1Rn groups in terms of cellularity (myeloid:erythroid ratios)  
539 or abnormalities (Fig. 6C). We could not consistently identify progenitor populations in blood or

540 spleen, therefore we performed complete blood counts (CBCs) during treatment to identify signs  
541 of bone marrow suppression (i.e., anemia, thrombocytopenia). There were no observable  
542 differences between LZD and LZD+IL-1Rn treatments (Supplementary Fig. 3). In conclusion, 4  
543 weeks of LZD was not sufficient to induce observable bone marrow suppression in cynomolgus  
544 macaques and blocking of IL-1R did not alter bone marrow status during LZD treatment of TB.

545

#### 546 **Reduction in neutrophil signatures in the lung during treatment**

547 To determine whether addition of IL-1Rn to LZD treatment modulated immune populations  
548 similar to observations in the mouse model, bronchoalveolar lavages (BAL) were acquired prior  
549 to the start of treatment and 3 weeks post treatment. Innate and adaptive immune cell  
550 populations were identified and frequencies were assessed by flow cytometry (Fig. 7A).  
551 Population frequencies of CD4 T cells, CD8 T cells, neutrophils (PMNs) and macrophages  
552 remain similar between LZD or LZD+IL-1Rn, indicating that IL-1Rn did not significantly alter the  
553 frequencies of immune populations in the airways. However, we observed a possible reduction  
554 in neutrophils post treatment in both groups. Therefore we pooled LZD and LZD+IL-1Rn treated  
555 animals and compared pre and post treatment immune populations. Although macrophage  
556 populations were relatively unchanged, there was a significant reduction in neutrophil frequency  
557 in the BAL after 3 weeks of treatment with LZD, regardless of IL-1Rn ( $p=0.0098$ ). To determine  
558 whether the cytokine milieu in the airways changed during treatment, a subset of 3 animals per  
559 group were chosen at random for analysis by multi-plex using 10X concentrated BAL fluid (Fig.  
560 7B). Statistical analysis was performed on combined treatment groups to only compare pre-  
561 and post-treatment changes. We assessed IL-1 $\beta$  and IL-1RA and saw no significant changes  
562 after treatment (IL-1 $\beta$   $p=0.1562$ , IL-1RA  $p=0.1250$ ). Interferon-inducible T cell alpha  
563 chemoattractant (I-TAC) is upregulated in response in interferons and IL-1 and is generally an  
564 indicator of inflammation, which appeared to be reduced post treatment, however was not

565 statistically significant ( $p=0.0625$ ). IL-8, a neutrophil chemoattractant, was significantly reduced  
566 after treatment, mirroring the reduction in neutrophil frequency observed by flow cytometry and  
567 the mouse data. These data suggest that treatment with either LZD or LZD+IL-1Rn rapidly  
568 reduces inflammatory signatures associated with TB disease in the airways.

569

### 570 **IL-1 blockade modulates granuloma environment and pathology**

571 To determine whether IL-1Rn modulated immune responses at the site of infection, we chose at  
572 random 5 granulomas per animal (25 per treatment group) and performed a multi-plex analysis  
573 of granuloma supernatants (Fig. 8A). There were no significant differences in IL-1 $\beta$ , IL-1RA, or  
574 IL-18 levels in either treatment group. IL-2 and IL-17 are correlated with protective immune  
575 responses during TB (31) and while IL-2 levels in LZD+IL-1Rn treatment were not statistically  
576 higher ( $p=0.0882$ ), a statistically significant increase in IL-17a in LZD+IL-1Rn treated animals  
577 was observed. Interestingly, G-CSF/CSF-3 levels were also significantly higher in LZD+IL-1Rn  
578 treated granulomas ( $p=0.0004$ ). These results indicate IL-1Rn immune modulation occurs in  
579 the granuloma environment. While we did not see a significant difference in granuloma  
580 inflammation by SUVR between treatment groups (Fig 4C), we questioned whether the changes  
581 in cytokines could be associated with change in SUVR. Therefore, we performed linear  
582 regression analyses and found a positive correlation between IL-1 $\beta$  and fold change of SUVR in  
583 LZD+IL-1Rn granulomas (Fig 8B). The IL-1 pathway is associated with fibrosis, which  
584 increases in granulomas during drug treatment (32). Furthermore, IL-17 and G-CSF are also  
585 associated with fibrosis (33). To determine whether immunomodulation by IL-1Rn changed  
586 granuloma pathology, granulomas suitable for histological analysis were evaluated by a study  
587 blinded pathologist and lesions were categorized based on treatment groups and descriptive  
588 qualities (Fig. 8C). Of lesions acquired from LZD only animals, ~71% were identified as fibrotic  
589 ( $n= 40/56$ ), while those treated with LZD+IL-1Rn had ~85% fibrotic lesions ( $n=39/46$ ) with no

590 significant difference in frequency of fibrotic lesions between treatment groups. We also  
591 compared the frequency of granulomas that were deemed necrotizing or non-necrotizing  
592 (“other” indicates neither categorization). Granulomas from LZD+IL-1Rn treated animals had  
593 significantly more non-necrotizing granulomas (~74%, n=34/46), compared to those from LZD  
594 alone treated macaques (~46%, n=26/56). The proportion of necrotizing granulomas was  
595 significantly lower in the LZD+IL-1Rn treatment group (13.04%, n=6/56) compared to LZD alone  
596 (30.36%, n=17/56) (p=0.0151). These data suggest that addition of IL-1Rn influences  
597 inflammation and antibiotic-associated pathology dynamics of granulomas.

598

## 599 **Discussion**

600 HDTs are a tantalizing solution to improve TB therapy, however the complexities of  
601 host-pathogen interactions and host variability call for rigorous pre-clinical testing before  
602 implementation in humans. Here, we sought to determine the efficacy and safety of an  
603 HDT for TB comprised of LZD and IL-1Rn. IL-1 plays a complex role during TB, as IL-1  
604 is important for early control of infection (7, 8, 34-36), yet is also associated with  
605 pathology at later times(10, 11). To validate the safety of IL-1Rn in this context, we first  
606 assessed the effects of IL-1 inhibition on TB disease progression in mice, using  
607 treatment regimens designed to concentrate on established disease. In C57BL/6, Nos2<sup>-</sup>  
608 <sup>-/-</sup> and C3HeB/FeJ mice,  $\alpha$ IL-1R1 blockade reduced PMN infiltrates that are associated  
609 with pathological inflammation and did not impair bacterial control. The effect on  
610 bacterial control differs from a recent report in which lung bacterial burdens were  
611 increased by a similar  $\alpha$ IL-1R1 treatment in C57BL/6 or C57BL/6 animals carrying the  
612 super susceptibility to tuberculosis-1 (Sst1) allele(25). We hypothesize that these  
613 differences are related to the timing of treatment, relative to the onset of adaptive



614 immunity. Once infection is established, bacterial control is mediated predominantly via  
615 T cell functions, potentially reducing the importance of IL-1 dependent mechanisms(37).  
616 According to this model, the effect of IL-1 inhibition will depend on the timing of  
617 administration, as well as experimental factors that alter the timing of T cell priming and  
618 expansion, such as bacterial strain and dose. Regardless, our data indicate that IL-1  
619 blockade can be beneficial in the context of established disease.

620

621 Any HDT will be administered in conjunction with antimicrobial therapy. When co-  
622 administered with LZD, blockade of IL-1R1 reduced PMN infiltrates in the mouse  
623 models, compared to the antibiotic alone. In macaques, IL-1Rn in conjunction with LZD  
624 significantly reduced overall lung inflammation as assessed by PET CT while LZD alone  
625 was more variable. IL-1Rn did not significantly enhance bacterial clearance compared  
626 to LZD alone, which was not surprising as we did not expect IL-1Rn to have direct  
627 antibacterial functions. However, it was important to assess bacterial burden during IL-  
628 1Rn treatment to ensure IL-1 blockade did not modulate host-mediated antibacterial  
629 mechanisms in granulomas and lymph nodes. In CFU positive lymph nodes, we  
630 observed a slight reduction in bacterial burden with IL-1Rn that approached significance  
631 ( $p=0.0965$ ). Further studies should include assessing the influence of drug treatment  
632 and immunomodulation in lymph nodes, as thoracic lymph nodes are recognized as a  
633 site of Mtb persistence (29)

634

635 To further assess the effects of IL-1Rn modulation of immune responses, we observed  
636 a decrease in neutrophils (PMNs) and a corresponding decrease in IL-8 in the airways

637 of both treatment group (LZD or LZD+IL-1Rn). This indicated LZD alone was  
638 efficacious in reducing PMN inflammatory signatures, likely due to the reduction in  
639 bacterial burden. In granulomas, levels of IL-1 $\beta$ , IL-1RA and IL-18 were not affected by  
640 IL-1Rn treatment in the subset examined. As IL-1Rn does not affect inflammasome  
641 formation and function it is not surprising that IL-1 $\beta$  and IL-18 production were minimally  
642 modulated by IL-1Rn. IL-1RA levels remained unchanged between treatment groups,  
643 which could be due to our method of detection or kinetics of consumption. Our  
644 multiplex analysis is specific for non-human primates and may not recognize  
645 recombinant human IL-1RA like Anakinra. In LZD+IL-1Rn treated granulomas we found  
646 a strong positive correlation between IL-1 $\beta$  levels and fold-change in SUVR, a surrogate  
647 for inflammation. These data highlight the relationship between IL-1 $\beta$  and inflammation  
648 in granulomas, further supporting the potential of IL-1 blockade as an HDT. In TB, IL-2  
649 and IL-17A have protective functions however are primarily expressed by T cells (31).  
650 While IL-1 $\beta$  has been reported to enhance IL-17A production by T cells in mice, these  
651 studies have primarily used model-antigen systems and may not reflect a chronic  
652 infection like TB (38). IL-1 exacerbates pathology later in TB infection, indicating the  
653 effects of IL-1 on adaptive immunity are complex and likely dependent on the host  
654 system and infection model being used. G-CSF was increased in granulomas from  
655 LZD+IL-1Rn treated macaques which, combined with our observations of reduced PMN  
656 infiltrates in mouse lungs and macaque airways, indicates a paradoxical role of G-CSF  
657 as a neutrophil differentiation factor (39). However, in a model of LPS-induced lung  
658 injury G-CSF blockade induced accumulation of PMNs and increased inflammation in

659 the lungs, indicating pulmonary inflammation may not follow dogmatic rules of canonical  
660 inflammatory pathways (39).

661  
662 Lung fibrosis is modulated by the IL-1 pathway and while fibrosis is associated with  
663 healing tissue, lung fibrosis can cause secondary complications after TB disease  
664 resolution (2). We have shown in previous studies that TB drug therapy induces fibrosis  
665 in granulomas (32, 40). These studies in combination with the correlation between IL-1 $\beta$   
666 and SUVR led us to assess whether LZD+IL-1Rn was associated with changes in  
667 granuloma pathology. While we did not observe a difference in fibrosis, there was a  
668 significant decrease in frequency of necrotizing granulomas with IL-1Rn in addition to  
669 LZD therapy. Thus, while there is no synergistic effect between IL-1Rn and LZD in  
670 promoting fibrosis associated with drug clearance, the reduction in neutrophils observed  
671 in mice and macaques could skew granuloma resolution towards a non-necrotizing  
672 lesion (41). Further studies with IL-1Rn alone could elucidate these dynamics, however  
673 we designed this macaque study with intention to be translatable to humans. We could  
674 not justify an IL-1Rn only treated group as TB-patients would receive anti-microbial  
675 therapy with any HDT or immunomodulatory intervention. However, our findings give  
676 precedence for further exploration of the potential of IL-1Rn as an HDT for TB and will  
677 require additional studies to determine mechanism and safety.

678  
679 Our second goal was to abrogate LZD-associated bone marrow suppression with IL-  
680 1Rn therapy, thereby increasing the efficacy and therapy potential of LZD in TB. While  
681 we designed our HDT to match the current FDA guidelines for LZD and IL-1Rn

682 schedules, this resulted in a lack of observable bone marrow suppression in macaques.  
683 In mice however, LZD-induced bone marrow suppression was reduced with the addition  
684 of IL-1R1 antagonist, supporting our initial hypothesis of the therapeutic potential of IL-  
685 1Rn in reducing LZD toxicity. The role of IL-1 signaling is consistent with the ability of IL-  
686 1 to suppress erythropoiesis in mice by reducing the number of progenitors (42). The  
687 remaining deficit in erythropoiesis during IL-1 blockade could reflect either incomplete  
688 inhibition by IL-1Rn or an independent role of inflammasome activation. Optimizing this  
689 effect will require further work to understand the relative roles of IL-1 signaling and  
690 inflammasome activation.

691  
692 Overall, our data support previous findings in macaques that LZD has superb efficacy  
693 against TB, administered here as a single-drug given for only 4-weeks, supporting LZD  
694 as an antimicrobial for MDR/XDR-TB cases (12). IL-1Rn therapy in conjunction with  
695 LZD was successful in reducing TB-associated inflammation with no negative effects on  
696 bacterial clearance. The differences in bone marrow suppression between mice and  
697 macaques highlights the importance of assessing HDTs in multiple models prior to  
698 human trials, as there are clear biological differences between the two models.  
699 Anakinra (IL-1Rn) is already FDA-approved for adult and pediatric treatment of other  
700 inflammatory disorders and our data provide pre-clinical evidence for IL-1Rn  
701 consideration as potential therapy in TB. Further safety and mechanism assessments  
702 in translatable animal models are required, but one could envision IL-1Rn therapy to  
703 limit destructive inflammation for severe cases of TB. While our study emphasizes the  
704 importance of rigorous testing of HDTs for TB in multiple translational models prior to

705 implementation in human trials, we also show that immunomodulation of the IL-1  
706 pathway did not exacerbate TB disease.

707

### 708 **Conflict of Interest Statement**

709 The authors declare that the research was conducted in the absence of any commercial or  
710 financial relationships that could be construed as a potential conflict of interest.

711

### 712 **Author Contributions Statement**

713 CW, BM, CS and JF drafted and edited this manuscript. BM, JP, MS, and SN contributed to  
714 mouse experiments and/or figures. CW, PM, CC, CA, BS, HB, AW, EC, MZ, VD, PL and JF  
715 contributed to macaque experiments, data and statistically analysis and/or figures. All authors  
716 approved the final version of this manuscript.

717

### 718 **Funding**

719 These studies were funded by NIH UH2AI122295 (JLF and CMS). CGW was supported by NIH  
720 T32AI049820.

721

### 722 **Acknowledgements**

723 We thank all members of the Flynn, Sasseti, Mattila, and Lin laboratories for their collaborative  
724 efforts during this study. We are grateful for intellectual contributions from Dr. Clifton Barry III  
725 and Dr. Robert Wilkinson. Special thanks to all the veterinary and research staff for their efforts,  
726 expertise and dedication to these studies.

727

728 This manuscript has been released as a pre-print at bioRxiv (Winchell et al) (43).

729

### 730 **Data Availability Statement:**

731 All data are provided in a supplemental table.

732

733 **References**

- 734 1. WHO. Global Tuberculosis Report 2018. 2018.
- 735 2. Pasipanodya JG, Miller TL, Vecino M, Munguia G, Garmon R, Bae S, et al. Pulmonary  
736 impairment after tuberculosis. *Chest*. 2007;131(6):1817-24.
- 737 3. Tobin DM. Host-Directed Therapies for Tuberculosis. *Cold Spring Harb Perspect Med*.  
738 2015;5(10).
- 739 4. Baindara P. Host-directed therapies to combat tuberculosis and associated non-  
740 communicable diseases. *Microb Pathog*. 2019;130:156-68.
- 741 5. Fremont CM, Togbe D, Doz E, Rose S, Vasseur V, Maillet I, et al. IL-1 Receptor-  
742 Mediated Signal Is an Essential Component of MyD88-Dependent Innate Response to  
743 *Mycobacterium tuberculosis* Infection. *The Journal of Immunology*. 2007;179(2):1178-89.
- 744 6. Di Paolo NC, Shafiani S, Day T, Papayannopoulou T, Russell DW, Iwakura Y, et al.  
745 Interdependence between Interleukin-1 and Tumor Necrosis Factor Regulates TNF-Dependent  
746 Control of *Mycobacterium tuberculosis* Infection. *Immunity*. 2015;43(6):1125-36.
- 747 7. Juffermans NP, Florquin S, Camoglio L, Verbon A, Kolk AH, Speelman P, et al.  
748 Interleukin-1 signaling is essential for host defense during murine pulmonary tuberculosis. *J*  
749 *Infect Dis*. 2000;182(3):902-8.
- 750 8. Mayer-Barber KD, Andrade BB, Barber DL, Hieny S, Feng CG, Caspar P, et al. Innate  
751 and adaptive interferons suppress IL-1alpha and IL-1beta production by distinct pulmonary  
752 myeloid subsets during *Mycobacterium tuberculosis* infection. *Immunity*. 2011;35(6):1023-34.
- 753 9. Mishra BB, Rathinam VA, Martens GW, Martinot AJ, Kornfeld H, Fitzgerald KA, et al.  
754 Nitric oxide controls the immunopathology of tuberculosis by inhibiting NLRP3 inflammasome-  
755 dependent processing of IL-1beta. *Nat Immunol*. 2013;14(1):52-60.

- 756 10. Mishra BB, Lovewell RR, Olive AJ, Zhang G, Wang W, Eugenin E, et al. Nitric oxide  
757 prevents a pathogen-permissive granulocytic inflammation during tuberculosis. *Nat Microbiol.*  
758 2017;2:17072.
- 759 11. Zhang G, Zhou B, Li S, Yue J, Yang H, Wen Y, et al. Allele-specific induction of IL-1beta  
760 expression by C/EBPbeta and PU.1 contributes to increased tuberculosis susceptibility. *PLoS*  
761 *Pathog.* 2014;10(10):e1004426.
- 762 12. Maxmen A. Treatment for extreme drug-resistant tuberculosis wins US government  
763 approval. *Nature* 2019.
- 764 13. Tan TQ, Yogev R. Clinical pharmacology of linezolid: an oxazolidinone antimicrobial  
765 agent. *Expert Rev Clin Pharmacol.* 2008;1(4):479-89.
- 766 14. Coleman MT, Chen RY, Lee M, Lin PL, Dodd LE, Maiello P, et al. PET/CT imaging  
767 reveals a therapeutic response to oxazolidinones in macaques and humans with tuberculosis.  
768 *Sci Transl Med.* 2014;6(265):265ra167.
- 769 15. Lee M, Lee J, Carroll MW, Choi H, Min S, Song T, et al. Linezolid for treatment of  
770 chronic extensively drug-resistant tuberculosis. *N Engl J Med.* 2012;367(16):1508-18.
- 771 16. Iyer SS, He Q, Janczy JR, Elliott EI, Zhong Z, Olivier AK, et al. Mitochondrial cardiolipin  
772 is required for Nlrp3 inflammasome activation. *Immunity.* 2013;39(2):311-23.
- 773 17. Weber A, Wasiliew P, Kracht M. Interleukin-1 (IL-1) pathway. *Sci Signal.*  
774 2010;3(105):cm1.
- 775 18. Furst DE. Anakinra: review of recombinant human interleukin-I receptor antagonist in the  
776 treatment of rheumatoid arthritis. *Clin Ther.* 2004;26(12):1960-75.
- 777 19. White AG, Maiello P, Coleman MT, Tomko JA, Frye LJ, Scanga CA, et al. Analysis of  
778 <sup>18</sup>F-FDG PET/CT Imaging as a Tool for Studying Mycobacterium tuberculosis Infection and  
779 Treatment in Non-human Primates. *J Vis Exp.* 2017(127).

- 780 20. Maiello P, DiFazio RM, Cadena AM, Rodgers MA, Lin PL, Scanga CA, et al. Rhesus  
781 Macaques Are More Susceptible to Progressive Tuberculosis than Cynomolgus Macaques: a  
782 Quantitative Comparison. *Infect Immun.* 2018;86(2).
- 783 21. Lin PL, Maiello P, Gideon HP, Coleman MT, Cadena AM, Rodgers MA, et al. PET CT  
784 Identifies Reactivation Risk in Cynomolgus Macaques with Latent *M. tuberculosis*. *PLoS*  
785 *Pathog.* 2016;12(7):e1005739.
- 786 22. Cadena AM, Fortune SM, Flynn JL. Heterogeneity in tuberculosis. *Nat Rev Immunol.*  
787 2017;17(11):691-702.
- 788 23. Lin PL, Pawar S, Myers A, Pegu A, Fuhrman C, Reinhart TA, et al. Early events in  
789 *Mycobacterium tuberculosis* infection in cynomolgus macaques. *Infect Immun.* 2006;74(7):3790-  
790 803.
- 791 24. Phuah JY, Mattila JT, Lin PL, Flynn JL. Activated B cells in the granulomas of nonhuman  
792 primates infected with *Mycobacterium tuberculosis*. *Am J Pathol.* 2012;181(2):508-14.
- 793 25. Ji DX, Yamashiro LH, Chen KJ, Mukaida N, Kramnik I, Darwin KH, et al. Type I  
794 interferon-driven susceptibility to *Mycobacterium tuberculosis* is mediated by IL-1Ra. *Nat*  
795 *Microbiol.* 2019;4(12):2128-35.
- 796 26. Driver ER, Ryan GJ, Hoff DR, Irwin SM, Basaraba RJ, Kramnik I, et al. Evaluation of a  
797 mouse model of necrotic granuloma formation using C3HeB/FeJ mice for testing of drugs  
798 against *Mycobacterium tuberculosis*. *Antimicrob Agents Chemother.* 2012;56(6):3181-95.
- 799 27. Boettcher S, Manz MG. Regulation of Inflammation- and Infection-Driven  
800 Hematopoiesis. *Trends Immunol.* 2017;38(5):345-57.
- 801 28. Lin PL, Coleman T, Carney JP, Lopresti BJ, Tomko J, Fillmore D, et al. Radiologic  
802 Responses in Cynomolgus Macaques for Assessing Tuberculosis Chemotherapy Regimens.  
803 *Antimicrob Agents Chemother.* 2013;57(9):4237-44.



- 804 29. Ganchua SKC, Cadena AM, Maiello P, Gideon HP, Myers AJ, Junecko BF, et al. Lymph  
805 nodes are sites of prolonged bacterial persistence during Mycobacterium tuberculosis infection  
806 in macaques. PLoS Pathog. 2018;14(11):e1007337.
- 807 30. Fung HB, Kirschenbaum HL, Ojofeitimi BO. Linezolid: an oxazolidinone antimicrobial  
808 agent. Clin Ther. 2001;23(3):356-91.
- 809 31. Gideon HP, Phuah J, Myers AJ, Bryson BD, Rodgers MA, Coleman MT, et al. Variability  
810 in tuberculosis granuloma T cell responses exists, but a balance of pro- and anti-inflammatory  
811 cytokines is associated with sterilization. PLoS Pathog. 2015;11(1):e1004603.
- 812 32. DiFazio RM, Mattila JT, Klein EC, Cirrincione LR, Howard M, Wong EA, et al. Active  
813 transforming growth factor-beta is associated with phenotypic changes in granulomas after drug  
814 treatment in pulmonary tuberculosis. Fibrogenesis Tissue Repair. 2016;9:6.
- 815 33. Borthwick LA. The IL-1 cytokine family and its role in inflammation and fibrosis in the  
816 lung. Semin Immunopathol. 2016;38(4):517-34.
- 817 34. Fremont CM, Togbe D, Doz E, Rose S, Vasseur V, Maillet I, et al. IL-1 receptor-  
818 mediated signal is an essential component of MyD88-dependent innate response to  
819 Mycobacterium tuberculosis infection. J Immunol. 2007;179(2):1178-89.
- 820 35. Mayer-Barber KD, Barber DL, Shenderov K, White SD, Wilson MS, Cheever A, et al.  
821 Caspase-1 independent IL-1beta production is critical for host resistance to mycobacterium  
822 tuberculosis and does not require TLR signaling in vivo. J Immunol. 2010;184(7):3326-30.
- 823 36. Cooper AM, Mayer-Barber KD, Sher A. Role of innate cytokines in mycobacterial  
824 infection. Mucosal Immunol. 2011;4(3):252-60.
- 825 37. Scanga CA, Mohan VP, Yu K, Joseph H, Tanaka K, Chan J, et al. Depletion of CD4(+) T  
826 cells causes reactivation of murine persistent tuberculosis despite continued expression of  
827 interferon gamma and nitric oxide synthase 2. J Exp Med. 2000;192(3):347-58.

- 828 38. Ben-Sasson SZ, Hu-Li J, Quiel J, Cauchetaux S, Ratner M, Shapira I, et al. IL-1 acts  
829 directly on CD4 T cells to enhance their antigen-driven expansion and differentiation. Proc Natl  
830 Acad Sci U S A. 2009;106(17):7119-24.
- 831 39. Bajrami B, Zhu H, Kwak HJ, Mondal S, Hou Q, Geng G, et al. G-CSF maintains  
832 controlled neutrophil mobilization during acute inflammation by negatively regulating CXCR2  
833 signaling. J Exp Med. 2016;213(10):1999-2018.
- 834 40. Warsinske HC, DiFazio RM, Linderman JJ, Flynn JL, Kirschner DE. Identifying  
835 mechanisms driving formation of granuloma-associated fibrosis during Mycobacterium  
836 tuberculosis infection. J Theor Biol. 2017;429:1-17.
- 837 41. Flynn JL, Chan J, Lin PL. Macrophages and control of granulomatous inflammation in  
838 tuberculosis. Mucosal Immunol. 2011;4(3):271-8.
- 839 42. Johnson CS, Pourbohloul SC, Furmanski P. Negative regulators of in vivo  
840 erythropoiesis: interaction of IL-1 alpha and TNF-alpha and the lack of a strict requirement for T  
841 or NK cells for their activity. Exp Hematol. 1991;19(2):101-5.
- 842 43. Caylin G. Winchell BBM, Jia Yao Phuah, Mohd Saqib, Samantha J. Nelson, Pauline  
843 Maiello, Chelsea M. Causgrove, Cassandra L. Ameel, Brianne Stein, H. Jacob Borish,  
844 Alexander G. White, Edwin C. Klein, Matthew D. Zimmerman, Véronique Dartois, Philana Ling  
845 Lin, Christopher M. Sasseti, JoAnne L. Flynn. Evaluation of IL-1 blockade as an adjunct to  
846 linezolid therapy for tuberculosis in mice and macaques. bioRxiv: bioRxiv; 2019.

847

## 848 **Figure Legends**

849

850 **Figure 1. IL-1 inhibition in susceptible mice reduces inflammation with no effect on lung**  
851 **bacterial burden.**

852 Wild type C57BL/6 and *Nos2*<sup>-/-</sup> mice were infected with Mtb Erdman for 2 weeks and treated  
853 with anti-IL-1R1 ( $\alpha$ IL-1R1) for the subsequent 2 weeks. (A) Lung neutrophil (PMN) infiltration  
854 was quantified by flow cytometry; (B) Weight loss and (C) CFU in lung and (D) spleen are  
855 shown. Data shown (mean  $\pm$  SD) are representative of two independent experiments. One-way  
856 ANOVA with Sidak's multiple comparisons-test was used. N=4 mice per treatment cohorts. (E)  
857 Histopathology analysis of a single lung lobe from WT or *Nos2*<sup>-/-</sup> mice was performed by  
858 Hematoxylin-eosin (H&E) staining.

859 **Figure 2. IL-1R1 blockade combined with Linezolid ameliorates TB disease.**

860 (A-D) C3HeB/FeJ mice were infected with Mtb Erdman for 4 weeks and treated with linezolid  
861 (LZD) and/or anti-IL-1R1 ( $\alpha$ IL-1R1) for the following 18 days. (A) Lung neutrophils were  
862 quantified by flow cytometry; (B) Percent change in body weight is shown and (C) Bacterial  
863 burden in the lung and (D) spleen were quantified as CFU. Data shown (Mean  $\pm$  SD) are  
864 representative of two independent experiments. Welch ANOVA with Dunnett's post-test was  
865 used to calculate statistical significance where each treatment group was compared to the  
866 vehicle as control group. N=3-5 mice per treatment group. (E-G) C3HeB/FeJ mice were infected  
867 with *M. tb* Erdman for 8 weeks and treated with linezolid (LZD) and/or an inhibitor of the NLRP3  
868 inflammasome (MCC950) for the following 21 days. (E) Lung neutrophils were quantified by flow  
869 cytometry. (F) Bacterial burden in the lung was quantified by CFU. Data shown (Mean  $\pm$  SD) are  
870 from one experiment. One-way ANOVA with Tukey's multiple comparison test was used to  
871 calculate the p-value. N=4-5 mice/group. (G) Representative immunofluorescence images of  
872 the lungs from different treatment groups. Cell nuclei stained with DAPI (blue), T-cells stained  
873 with anti-mouse CD3 $\epsilon$  (green) and neutrophils stained with anti-mouse Ly-6G (red).

874

875 **Figure 3. Erythropoiesis associated with LZD treatment was partially relieved after IL-**  
876 **1R1 blockade.**

877 C3HeB/FeJ mice were infected with *Mtb* Erdman for 4 weeks, and treated with LZD either alone  
878 or in combination with anti-IL-1R1 antibody for the subsequent 18 days. (A) Gating strategy for  
879 detecting erythroid progenitors is shown. Erythroid progenitors in the spleen (B-C) and bone  
880 marrow (D-E) were quantified by flow cytometry as described in Materials and Methods.  
881 Representative flow cytometry plots and percent changes in the early erythroid progenitors (Pro-  
882 Ery, EryA, EryB) among different treatment groups are shown. Data shown (Mean  $\pm$  SD) are  
883 from two independent experiments. One-way ANOVA with Dunnett's post-test was applied to  
884 calculate the p-value by comparing the mean of each group with that of LZD treated group.  
885 N=3-5 mice per group.

886

#### 887 **Figure 4. HDT reduces granuloma inflammation by PET/CT in macaques**

888 *Cynomolgus* macaques were infected with *Mtb* Erdman for approximately 4 months (see  
889 Supplementary Table 1) and randomized to treatment with LZD or LZD+IL-1Rn for an additional  
890 4 weeks. PET CT scans were performed pre-treatment 0, 2 and 4 weeks post-treatment with 4  
891 week scans as the last prior to necropsy. (A) 3-D renderings of PET/CT scans from pre-  
892 treatment and 4 weeks post-treatment are depicted, with “best” and “worst” of each group  
893 referring to TB disease prior to drug administration. (B) Total lung FDG activity of each  
894 macaque throughout treatment with LZD (left) or LZD+IL-1Rn (right). Two-way ANOVA with  
895 Dunnett's adjusted p-values are reported. (C) Individual granulomas were identified pre-  
896 treatment and tracked post-treatment by PET/CT. Change in size (by CT) was determined for  
897 granulomas from each animal; the median (left) change in granuloma size from each animal and  
898 individual granulomas per animal (right). (D) Standard uptake value (SUVR) of  $^{18}\text{F}$ -FDG was  
899 calculated for each granuloma, representing inflammation. The median change in SUVR of all  
900 granulomas (left) and change in SUVR of individual granulomas from each animal (right) are  
901 shown. Mann-Whitney tests determined p values for (C) and (D), with  $p < 0.05$  considered  
902 significant.

903

904 **Figure 5. Addition of IL-1Rn does not modify efficacy of LZD-bacterial killing**

905 Bacterial burden is shown after 4 weeks of LZD (blue) or LZD+IL-1Rn (red) treatment. (A) Total  
906 thoracic (lung + lymph nodes) and lung CFU; each data point represents one macaque. Total  
907 thoracic CFU from 3 similarly infected untreated historical control macaques (black) are included  
908 as reference for untreated CFU at this time point, but excluded from statistical analysis. (B) The  
909 percent of all lung granulomas that were CFU+ per monkey. (C) CFU of all thoracic lymph  
910 nodes with data points representing CFU from one macaque. CFU+ lymph nodes show the  
911 CFU from each thoracic lymph node in any animal that was Mtb+. For (A) and (B), p values  
912 were determined by Mann-Whitney test. (C) PET/CT scans from pre-treatment were used to  
913 model predicted CFU prior to HDT initiation and compared to actual CFU determined at time of  
914 necropsy. The predicted change in CFU was determined by: Actual total thoracic CFU post-  
915 treatment– Predicted total thoracic CFU interval (predicted from pre-drug-treatment scan). Bars  
916 represent mean of prediction intervals and error whiskers represent the lower and upper bounds  
917 of the difference between final total CFU and predicted CFU prior to drug treatment.

918

919 **Figure 6. Linezolid-associated bone marrow suppression was not observed in macaques**

920 Bone marrow was acquired from the sternum of all macaques at necropsy after 4 weeks LZD or  
921 LZD+IL-1Rn. A portion was used for flow cytometric analysis of erythroid progenitor populations  
922 and the rest for histopathology analysis. (A) A schematic of erythropoiesis indicating the stage  
923 of differentiation and corresponding expression levels of phenotyping markers (CD235a and  
924 CD71) and progenitor ratios (1:2:4:8). Included is the gating strategy to identify progenitor  
925 populations and an example of MitoTracker staining. (B) The ProE:EryC ratio (left) of each  
926 animal, including untreated TB only macaques (black) from other ongoing unpublished studies.  
927 A single uninfected animal (open circle) is shown as reference, the dotted line indicates the  
928 homeostatic ratio of 1:8. MitoTracker MFI (right) is shown for each macaque per treatment

929 group. Kruskal-Wallis test was performed to compare the three groups (excluding uninfected  
930 macaque) and p values are shown in the graphs. (C) Representative H&E images from sternal  
931 bone marrow acquired at necropsy, 20x (left) and 40x (right) are shown.

932

### 933 **Figure 7. HDT reduces inflammatory signatures in BAL**

934 Bronchoalveolar lavages (BAL) were acquired pre-treatment and 3 weeks post-treatment with  
935 LZD (blue) or LZD+IL-1Rn (red). (A) Cells were analyzed by flow cytometry to determine  
936 frequency changes in CD4 T cells (CD3+CD4+), CD8 T cells (CD3+CD8+), macrophages  
937 (CD11b+CD206+) and neutrophils (CD11b+Calprotectin+). Wilcoxon signed rank test was  
938 performed to determine differences before and after drug treatment, regardless of group (LZD  
939 and LZD+IL-1Rn combined). (B) BAL fluid was concentrated 10X and assessed by multiplex  
940 assay for changes in inflammatory cytokines and chemokines for a random subset of samples  
941 (n=3 per treatment group). Wilcoxon signed rank test was performed to determine differences  
942 before and after drug treatment, regardless of group (LZD and LZD+IL-1Rn combined).

943

### 944 **Figure 8. Inflammation modulation by HDT influences granuloma resolution**

945 (A) Randomly selected granulomas (n=5 per macaque, n=25 per treatment group) were  
946 subjected to multiplex cytokine analysis to determine differences between treatment groups  
947 (colors indicate lesions from a single animal). p values shown determined by Mann-Whitney  
948 test. (B) A linear regression analysis of IL-1 $\beta$  levels and fold change in SUVR is depicted for  
949 LZD (blue) and LZD+IL-1Rn (red) granulomas. R<sup>2</sup> and p values are provided in the legend.  
950 (C) Granulomas from LZD (n=57) and LZD+IL-1Rn (n=45) were examined by a pathologist (EK)  
951 and categorized. We compared fibrotic (red) vs non-fibrotic (gray) (left) frequencies between  
952 treatment groups. The right compares necrotizing (red) vs non-necrotizing (blue) and other  
953 (gray) granuloma frequencies. Fisher's exact test p-values are reported.

954

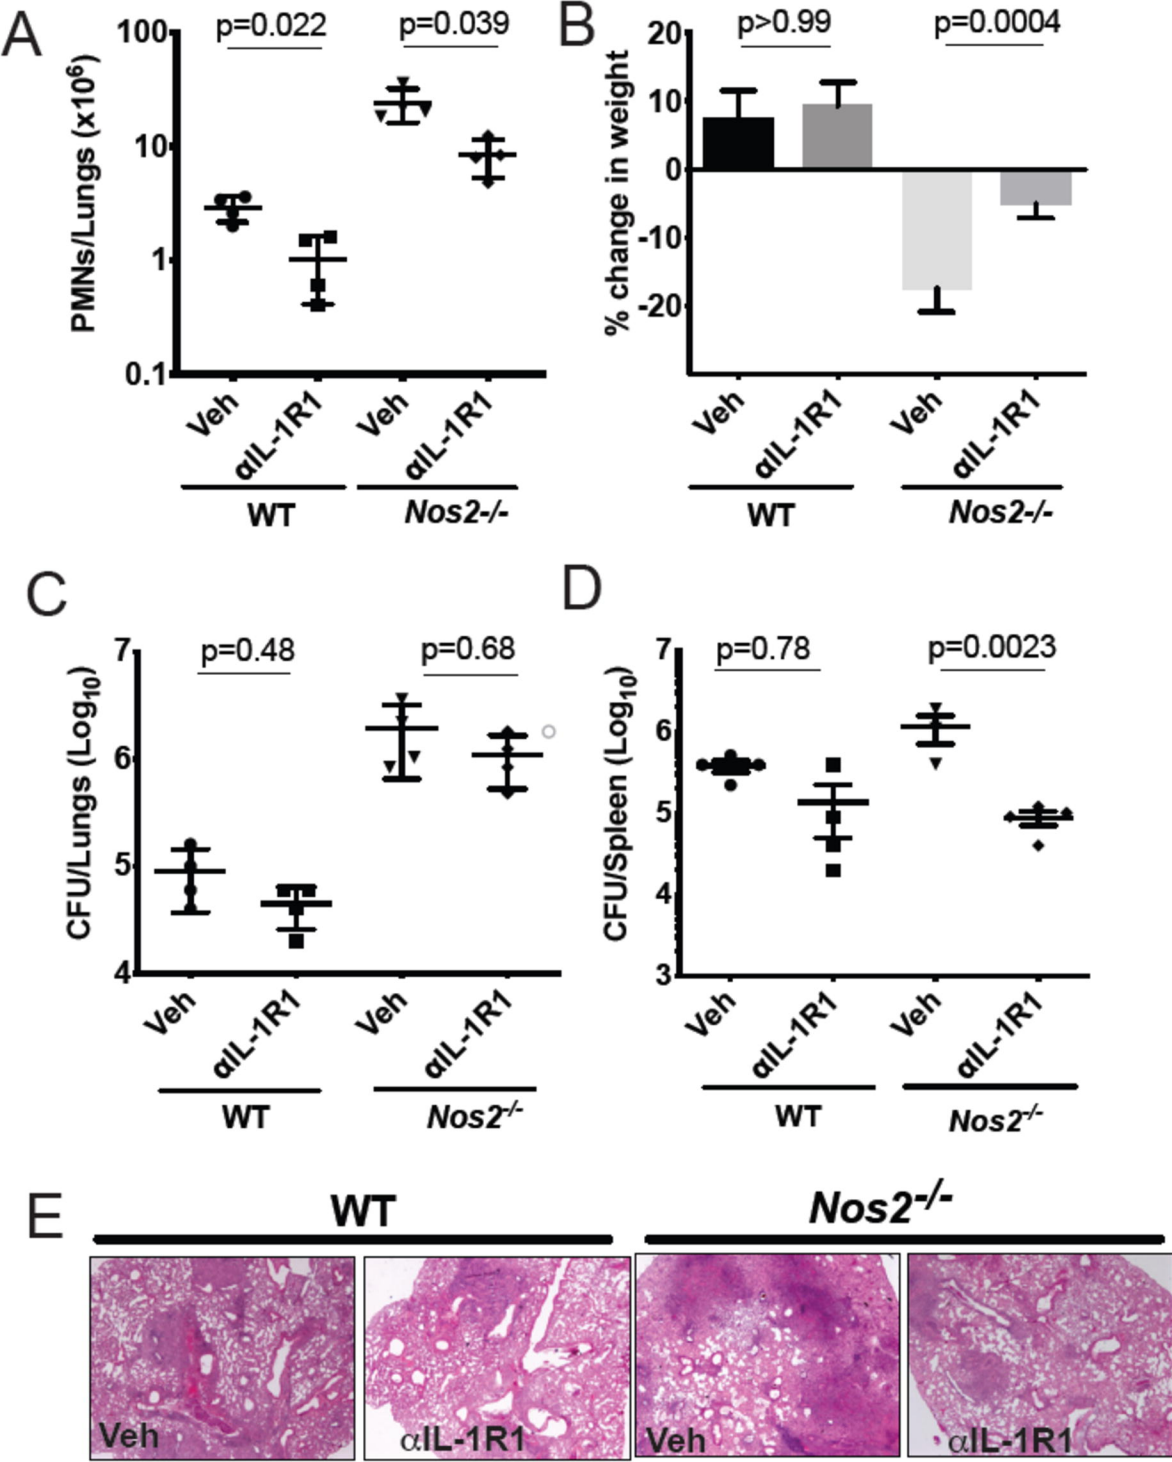

**A**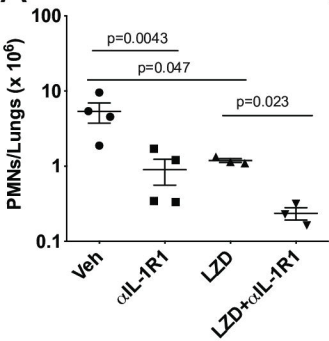**B**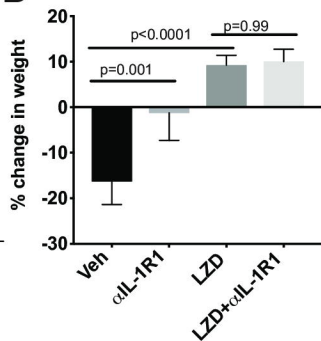**C**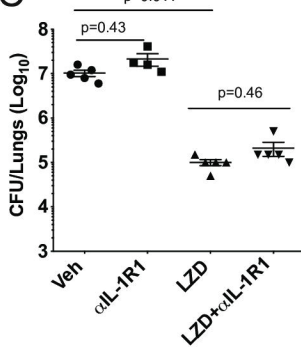**D**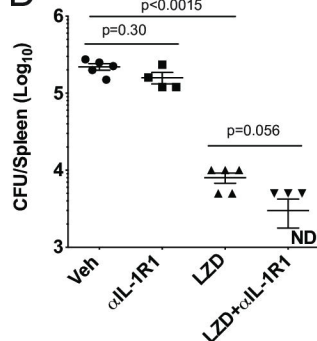**E**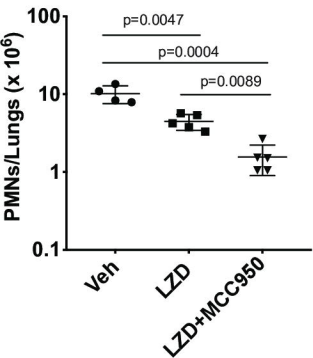**F**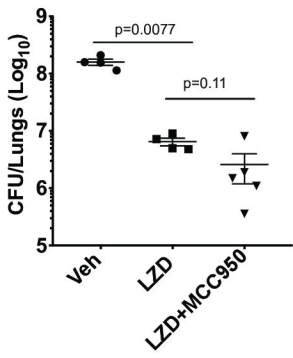**G**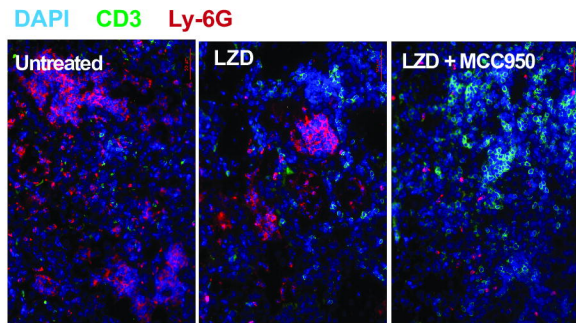



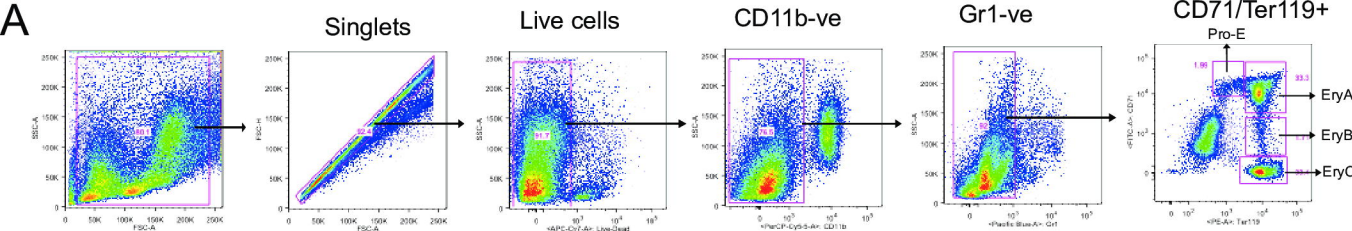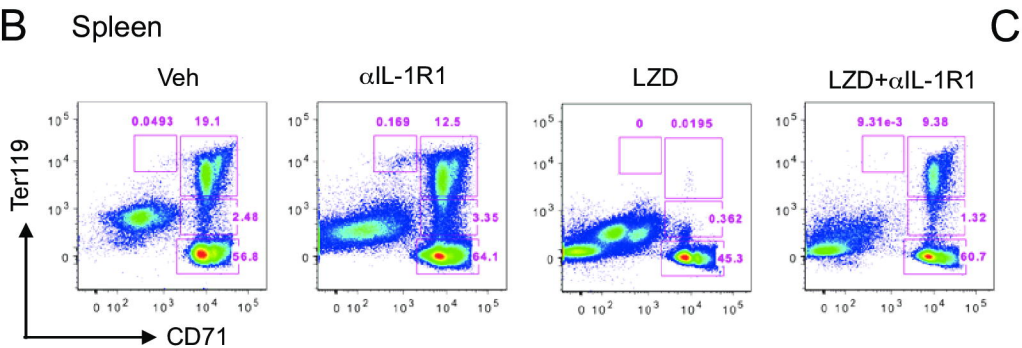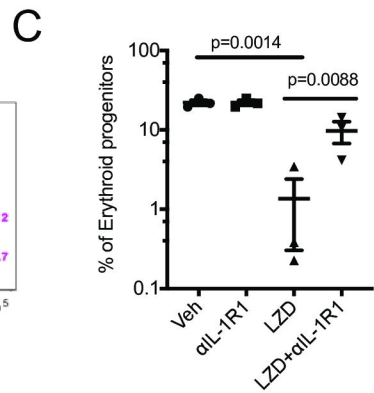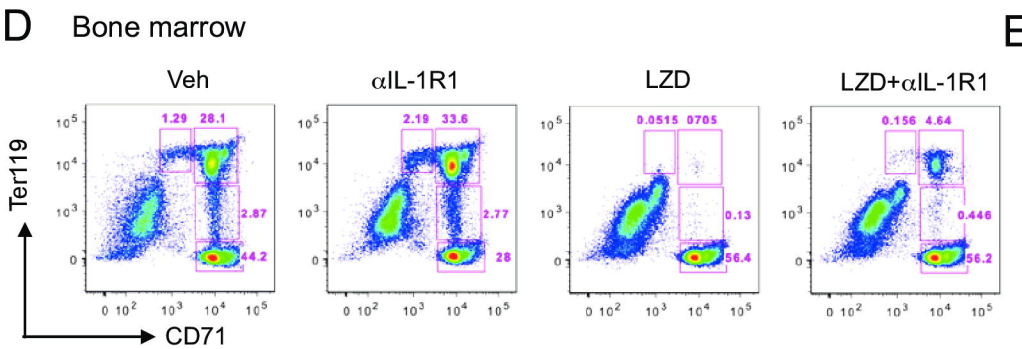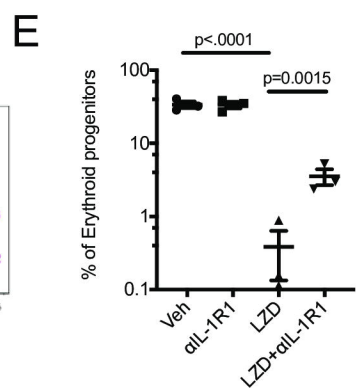

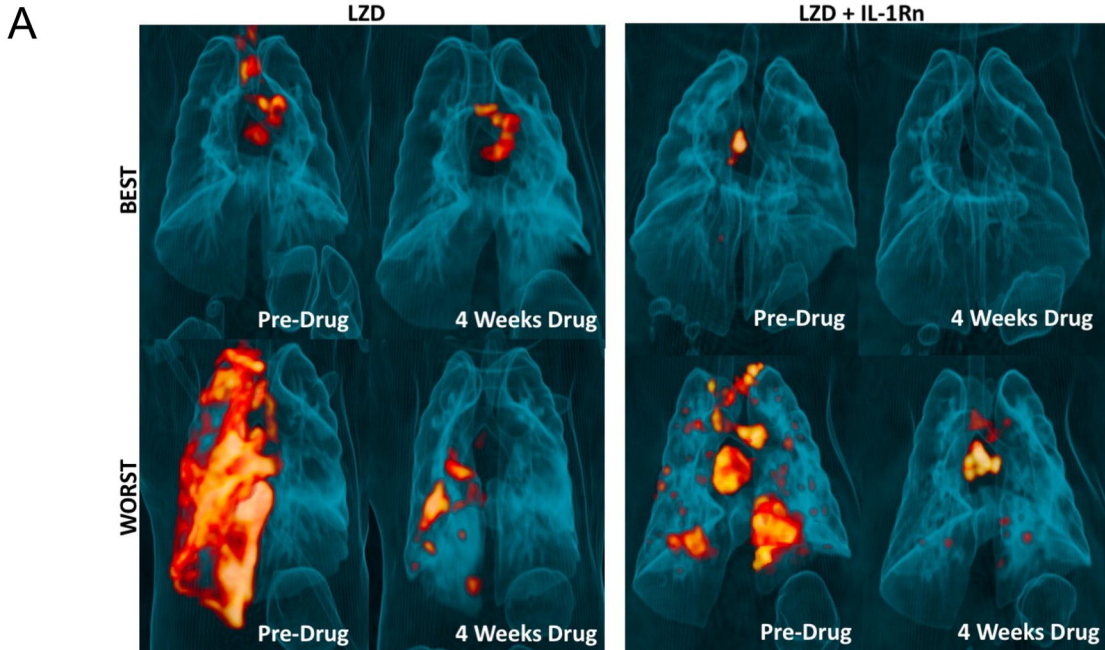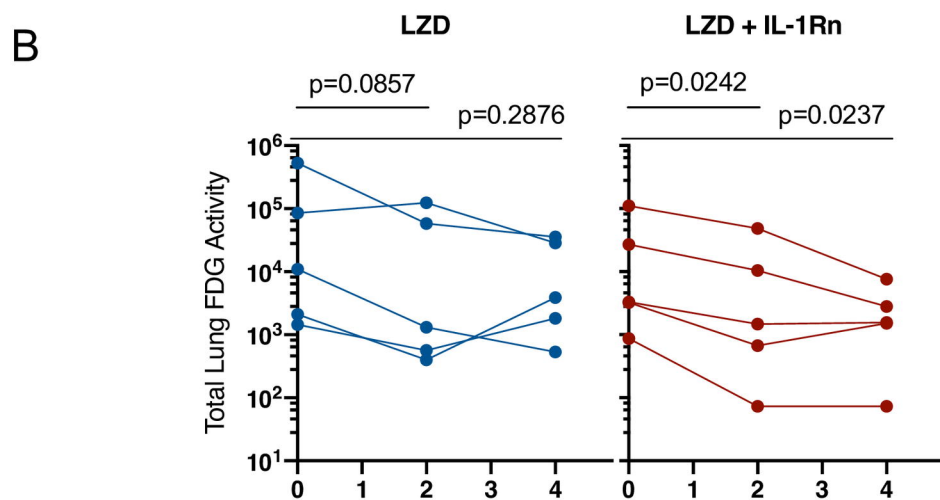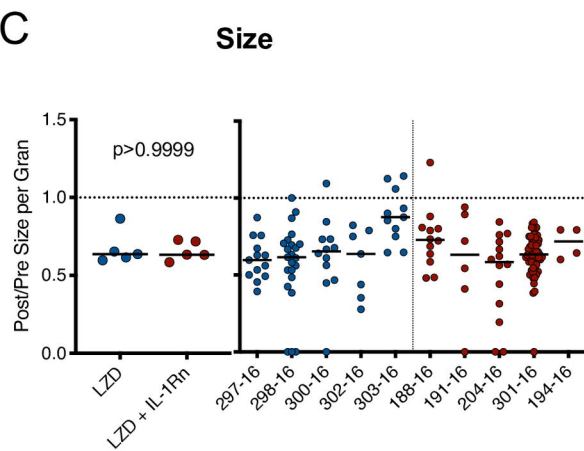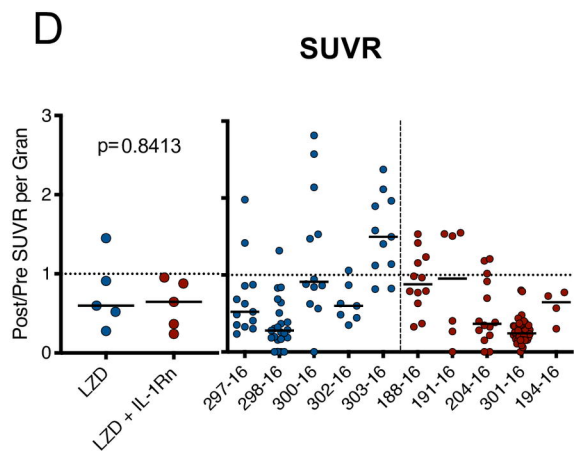

**A**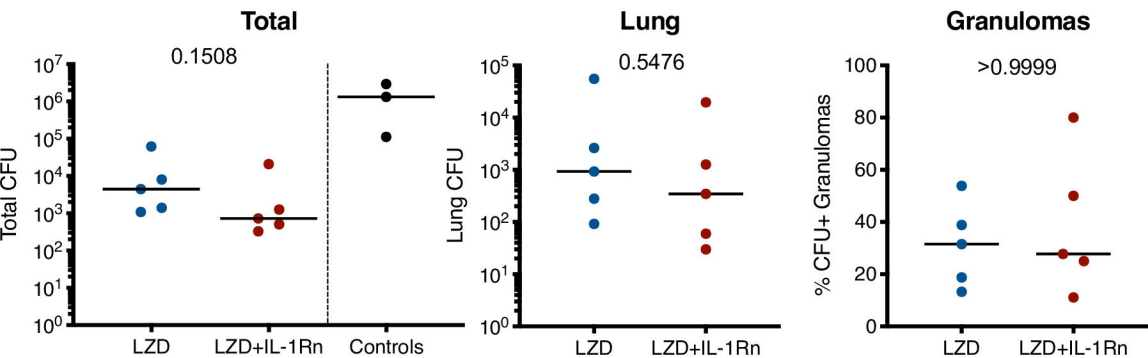**B**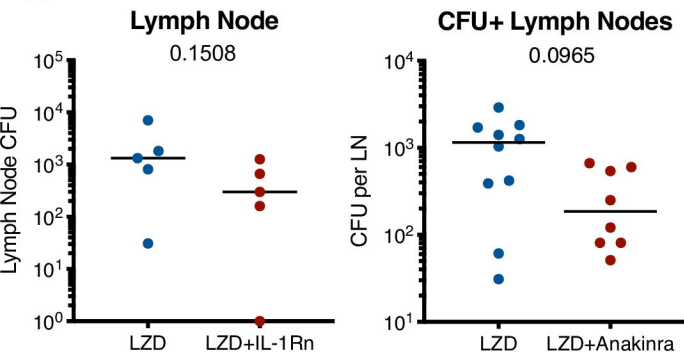**C**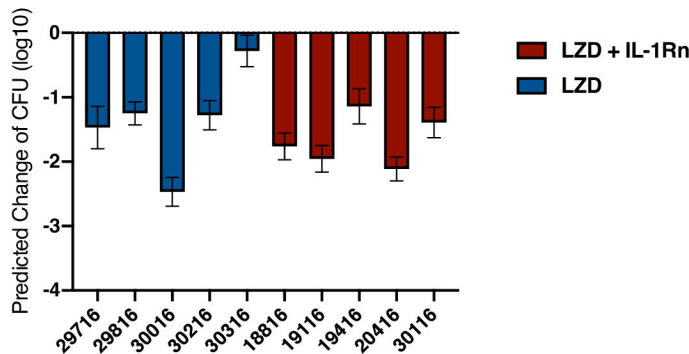

A

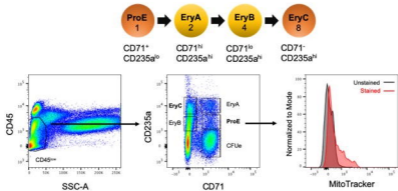

B

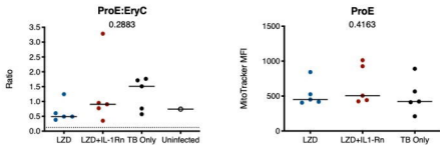

C

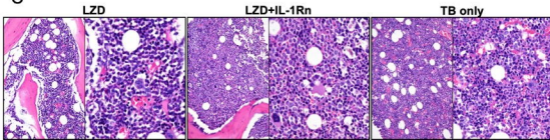

A

CD4 T cells

p=0.7695

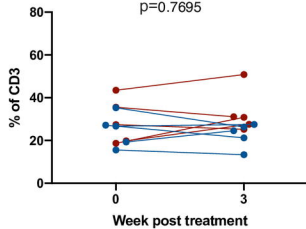

CD8 T cells

p=0.7695

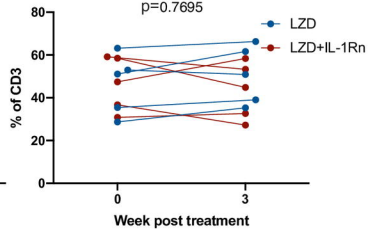

Macrophages

p=0.6953

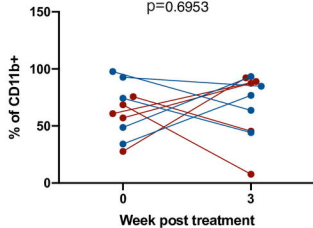

Neutrophils

p=0.0098

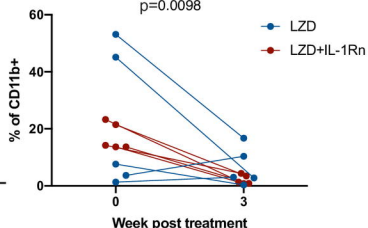

B

IL-1 $\beta$ 

p=0.1562

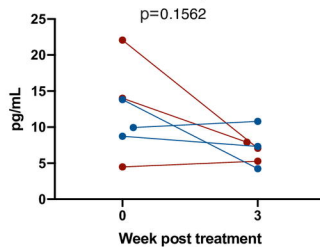

IL-8

p=0.0312

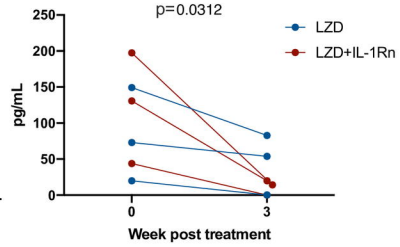

I-TAC

p=0.0625

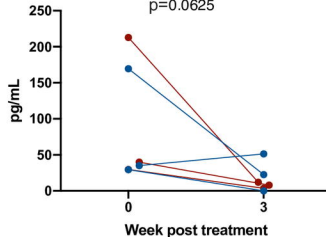

IL-1RA

p=0.1250

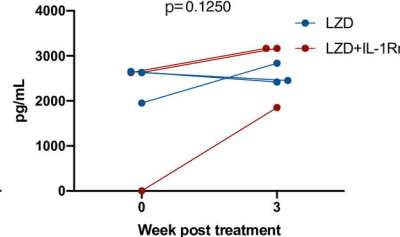

A

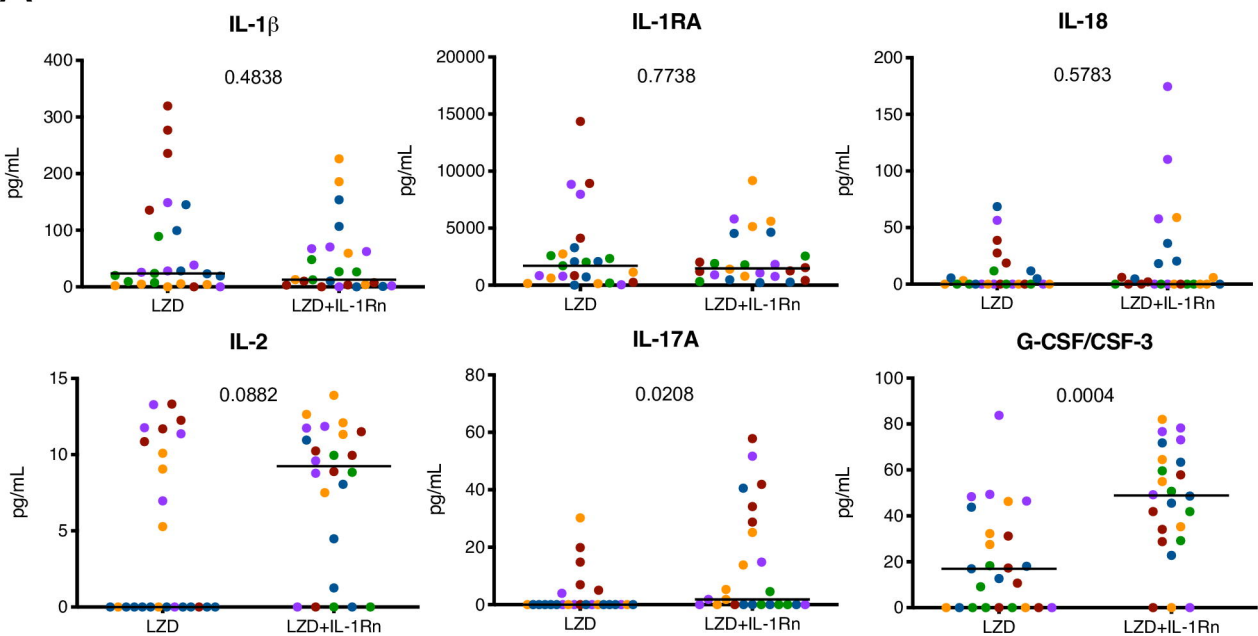

B

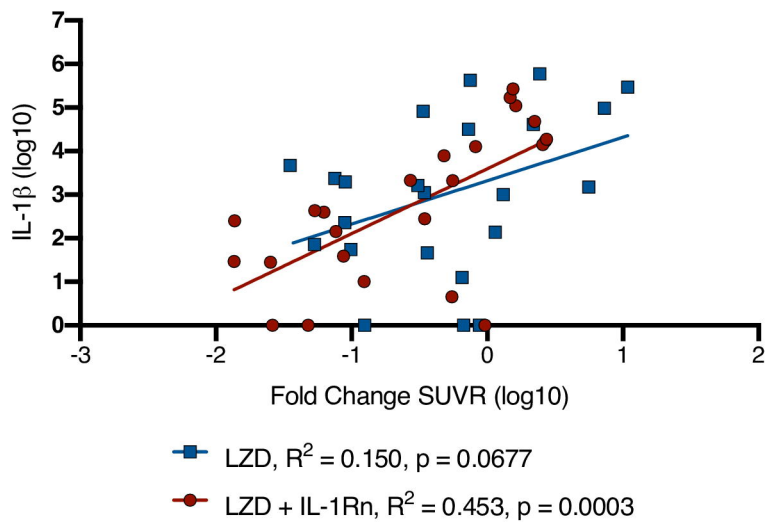

C

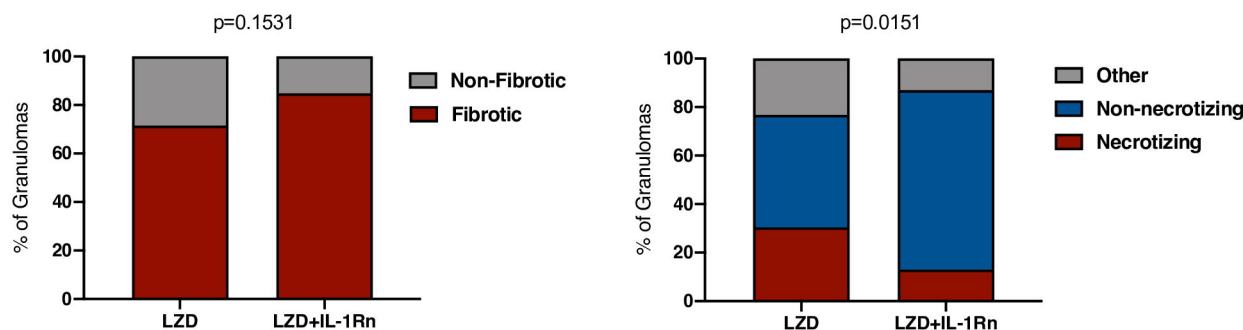

Source: https://www.biorxiv.org/content/10.1101/792390v2.full.pdf
